# Supplementary material for: Cascade cyclization of 1,2,7,8-tetraones and total synthesis of (±)-nesteretal A
Source: Royal Society of Chemistry journal article supplement (doi:10.1039/d2qo00740a), 2022-01-01
Supplement: d2qo00740a1.pdf [file d2qo00740a1.pdf]

Electronic Supplementary Information

**Cascade cyclization of 1,2,7,8-tetraones  
and total synthesis of (±)-nesteretal A**

Tomoka Dentani<sup>+</sup>, Ayano Kawachi<sup>+</sup>, Misaki Kato, Tomoyuki Yoshimura, and Jun-ichi Matsuo\*

Contents

|                                                                                 |     |
|---------------------------------------------------------------------------------|-----|
| Scheme S1. Isomerization of <b>6a</b> to <b>5a</b> -----                        | S3  |
| General -----                                                                   | S4  |
| Synthesis of <b>4a</b> -----                                                    | S4  |
| Synthesis of <b>4b</b> -----                                                    | S5  |
| The cyclization of <b>4a</b> under kinetic conditions (cat. BTMG, -78 °C) ----- | S5  |
| Characterization data of <b>5a</b> and <b>6a</b> -----                          | S6  |
| The cyclization of <b>4a</b> under thermodynamic conditions -----               | S7  |
| L-Proline-catalyzed enantioselective cyclization of <b>4a</b> -----             | S8  |
| Acetylation of (-)- <b>5a</b> and <b>6a</b> -----                               | S8  |
| Synthesis of <b>12</b> -----                                                    | S9  |
| Synthesis of <b>13</b> -----                                                    | S10 |
| Synthesis of <b>14</b> -----                                                    | S11 |
| Synthesis of <b>15</b> -----                                                    | S11 |

|                                                                            |     |
|----------------------------------------------------------------------------|-----|
| Synthesis of <b>16</b> -----                                               | S12 |
| Synthesis of (±)-Nesteretal A ( <b>1</b> ) -----                           | S13 |
| X-ray Crystallography of <b>5a'</b> -----                                  | S14 |
| Figure S1. DFT calculations of <b>4a</b> , <b>5a</b> , and <b>6a</b> ----- | S15 |
| Determination of the absolute configuration of (-)- <b>5a</b> -----        | S20 |
| References -----                                                           | S32 |
| <sup>1</sup> H and <sup>13</sup> C NMR of new compounds -----              | S33 |
| Chiral HPLC data of <b>5a'</b> -----                                       | S51 |
| Chiral HPLC data of monobenzylated <b>13</b> -----                         | S53 |

**Scheme S1.** Isomerization of **6a** to **5a**.

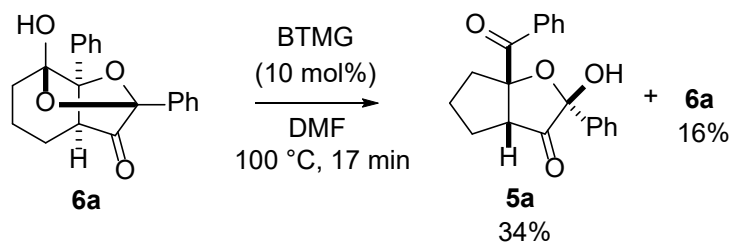

## General

All melting points were determined on Yanagimoto micro melting point apparatus. Infrared spectra (IR) were recorded on Horiba IR-710.  $^1\text{H}$  NMR spectra were recorded on a JEOL JNM ECA600 (600 MHz), JEOL JNM ECZ 600 (600 MHz), or a JEOL JNM ECS400 (400 MHz) spectrometer at room temperature; chemical shifts ( $\delta$ ) are reported in parts per million relative to tetramethylsilane. Splitting pattern are designated as s, singlet; d, doublet; t, triplet; q, quartet; m, multiplet; br, broad.  $^{13}\text{C}$  NMR spectra were recorded on a JEOL JNM ECA600 (150 MHz), JEOL JNM ECZ 600 (150 MHz), or JEOL JNM ECS400 (100 MHz) spectrometer with complete proton decoupling. Chemical shifts are reported in parts per million relative to tetramethylsilane with the solvent resonance as the internal standard  $\text{CDCl}_3$ . HRMS data were recorded on JEOL JMS-T100TD. Elemental analysis was performed with J-Science Lab Micro Coder JM-10. X-ray crystallographic analysis was performed on Rigaku R-Axis RAPIDII-S. UV spectrum was recorded on Shimadzu UV-2600i spectrometer. ECD spectrum was obtained on JASCO J-820 spectrometer. Analytical TLC was performed on Merck precoated TLC plates (silica gel 60 GF254, 0.25 mm). Silica gel column chromatography was carried out on silica gel 60 N (Kanto Kagaku Co., Ltd., spherical, neutral, 63-210  $\mu\text{m}$ ). All reactions were carried out under nitrogen atmosphere in a dried glassware with magnetic stirring. 1-Propynylmagnesium bromide (0.5 M solution in THF) was purchased from Aldrich. The aldol cyclization of 1,2,7,8-tetraones should be carried out under shielding lights.

### Synthesis of 1,8-diphenyloctan-1,2,7,8-tetraone (**4a**)

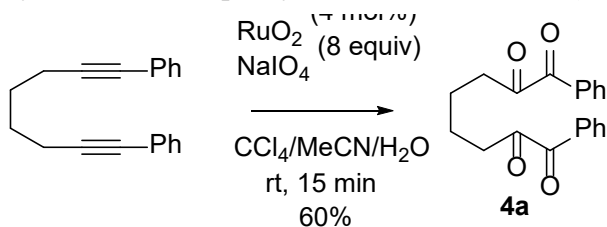

To a stirred mixture of 1,8-diphenylocta-1,7-diyne<sup>1</sup> (224 mg, 0.87 mmol) in acetonitrile (4.5 mL), tetrachloromethane (4.5 mL), and water (6.8 mL) were added  $\text{NaIO}_4$  (1.5 g, 7.1 mmol) and  $\text{RuO}_2$  (5.1 mg, 0.038 mmol) successively at room temperature. After stirring the resulting mixture for 15 min at room temperature,  $\text{H}_2\text{O}$  (30 mL) was added, and the mixture was extracted with  $\text{CH}_2\text{Cl}_2$ . The organic layer was dried over anhydrous  $\text{Na}_2\text{SO}_4$ , filtered through Celite, and concentrated. The crude product was purified by chromatography on silica gel (silica gel:20 g, eluent: benzene) to afford 1,8-diphenyloctan-1,2,7,8-tetraone (**4a**) (168 mg, 0.52 mmol, 60%) as a yellow oil.

$^1\text{H}$  NMR (600 MHz,  $\text{CDCl}_3$ ):  $\delta$  7.99 (4H, d,  $J = 7.2$  Hz), 7.65 (2H, t,  $J = 7.2$  Hz), 7.50 (4H, t,  $J = 7.2$  Hz), 2.95 (4H, m), 1.81 (4H, m);  $^{13}\text{C}$  NMR (100 MHz,  $\text{CDCl}_3$ ):  $\delta$  202.6, 192.1, 134.6, 131.9, 130.2, 128.9, 38.3, 22.3; IR ( $\text{CHCl}_3$ )  $\text{cm}^{-1}$ : 1714, 1674; Anal. calcd for  $\text{C}_{20}\text{H}_{18}\text{O}_4$ : C, 74.52; H, 5.63, found C, 74.21, H, 5.33.

### Synthesis of decan-2,3,8,9-tetraone (**4b**)

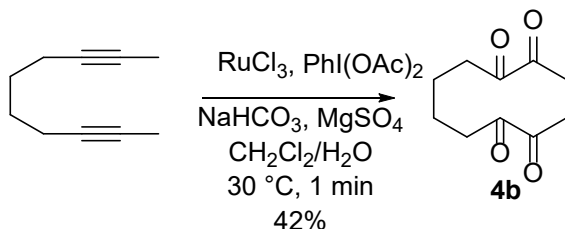

To a stirred mixture of deca-2,8-diyne<sup>2</sup> (50 mg, 3.73 mmol) in  $\text{CH}_2\text{Cl}_2$  (1.5 mL) and  $\text{H}_2\text{O}$  (0.3 mL) were added  $\text{NaHCO}_3$  (2.4 mg, 0.029 mmol),  $\text{MgSO}_4$  (11.1 mg, 0.092 mmol), and  $\text{PhI}(\text{OAc})_2$  (721.5 mg, 2.24 mmol) at room temperature. Then,  $\text{RuCl}_3$  (0.16 mg, 0.75  $\mu\text{mol}$ ) in  $\text{H}_2\text{O}$  (0.1 mL) was added at room temperature, and the resulting mixture was stirred at 30  $^\circ\text{C}$  for 1 min. The mixture was extracted with  $\text{AcOEt}$ , and the organic layer was washed with  $\text{H}_2\text{O}$ , dried over anhydrous  $\text{Na}_2\text{SO}_4$ , filtered, and concentrated. The crude product was purified by chromatography on silica gel (hexane/ $\text{AcOEt}$  = 5:1) to afford decan-2,3,8,9-tetraone (**4b**) (31.4 mg, 0.158 mmol, 42%) as a yellow powder.

Mp: 79.5-81.0  $^\circ\text{C}$  (recryst. from Hexane/ $\text{AcOEt}$ );  $^1\text{H}$  NMR (600 MHz,  $\text{CDCl}_3$ ):  $\delta$  2.77 (4H, m), 2.34 (6H, s), 1.62 (4H, m);  $^{13}\text{C}$  NMR (100 MHz,  $\text{CDCl}_3$ ):  $\delta$  198.8, 197.4, 35.3, 23.6, 22.3; IR ( $\text{CHCl}_3$ )  $\text{cm}^{-1}$ : 1714, 1356; Anal. calcd for  $\text{C}_{10}\text{H}_{14}\text{O}_4$ : C, 60.59; H, 7.12, found C, 60.29, H, 7.21.

### The cyclization of **4a** under kinetic conditions

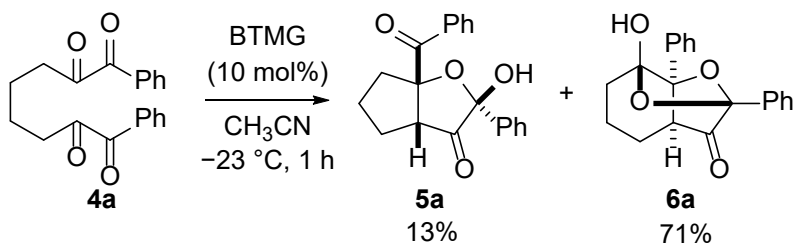

To a stirred solution of **4a** (20 mg, 62  $\mu\text{mol}$ ) in  $\text{CH}_3\text{CN}$  (0.4 mL) was added a solution of BTMG (1.1 mg, 6.2  $\mu\text{mol}$ ) in  $\text{CH}_3\text{CN}$  (0.2 mL) at  $-23\text{ }^\circ\text{C}$ , and the mixture was stirred at  $-23\text{ }^\circ\text{C}$  for 1 h. The reaction was quenched by the addition of saturated aqueous  $\text{NH}_4\text{Cl}$  solution, and the resulting mixture was extracted with  $\text{AcOEt}$  (three times). The combined organic extracts were dried over anhydrous  $\text{Na}_2\text{SO}_4$ , filtered, and concentrated. The yields of **5a** (13%) and **6a** (71%) was determined by  $^1\text{H}$  NMR spectra by using 1,3,5-trimethoxybenzene as an internal standard. Compounds **5a** and **6a** were isolated by purification with column chromatography on silica gel.

**(1*R*\*,3*R*\*,5*S*\*)-5-Benzoyl-3-hydroxy-3-phenyl-4-oxabicyclo[3.3.0]octan-2-one (5a)**

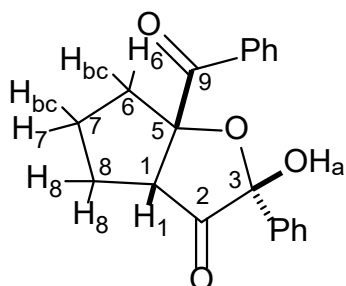

**5a**

White solid; mp: 117.0-119.5 ° C (recryst from CHCl<sub>3</sub>); <sup>1</sup>H NMR (400 MHz, CDCl<sub>3</sub>): δ 8.22 (2H, d, *J* = 7.6 Hz), 7.60-7.39 (8H, m), 3.95 (1H, t, *J* = 6.3 Hz, H<sub>1</sub>), 2.77 (1H, brs, H<sub>a</sub>), 2.69-2.65 (1H, m, H<sub>6</sub>), 2.13-2.09 (2H, m, H<sub>8</sub>, H<sub>8</sub>), 2.05-1.97 (2H, m, H<sub>b</sub>, H<sub>c</sub>), 1.86-1.76 (1H, m, H<sub>7</sub>); <sup>13</sup>C NMR (150 MHz, CDCl<sub>3</sub>): δ 207.6 (C2), 200.3 (C9), 136.5, 134.8, 133.0, 130.3, 129.4, 128.3, 128.3, 126.3, 100.4 (C3), 96.1 (C5), 51.1 (C1), 40.6 (C6), 30.2 (C8), 26.5 (C7); IR (CHCl<sub>3</sub>) cm<sup>-1</sup>: 3558, 1768 (C=O), 1678 (PhCO); HRMS (DART) *m/z* calcd for C<sub>20</sub>H<sub>17</sub>O<sub>3</sub> [(M-OH)<sup>+</sup>]: 305.11777, found 305.11819.

**(1*R*\*,2*R*\*,6*R*\*,8*R*\*)-2-Hydroxy-1,8-diphenyl-9,10-dioxatricyclo[4.3.0.1<sup>2,8</sup>]decan-7-one (6a)**

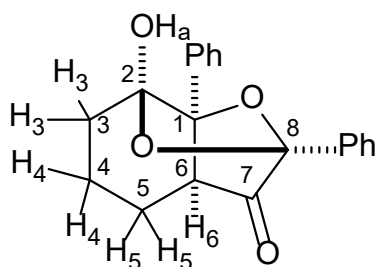

**6a**

Colorless oil: <sup>1</sup>H NMR (400 MHz, CDCl<sub>3</sub>): δ 7.69-7.67 (4H, m), 7.48-7.42 (6H, m), 2.99 (1H, brs, H<sub>a</sub>), 2.77 (1H, brs, H<sub>6</sub>), 2.34 (1H, d, *J* = 14.4 Hz, H<sub>3</sub>), 2.22 (1H, d, *J* = 14.8 Hz, H<sub>5</sub>), 2.07 (1H, dt, *J* = 4.8, 13.9 Hz, H<sub>3</sub>), 1.88 (1H, tt, *J* = 4.6, 14.0 Hz, H<sub>5</sub>), 1.78 (1H, d, *J* = 14.0 Hz, H<sub>4</sub>), 1.66 (1H, tt, *J* = 4.4, 13.8 Hz, H<sub>4</sub>); <sup>13</sup>C NMR (100 MHz, CDCl<sub>3</sub>): δ 202.0 (C7), 134.5, 130.0, 129.4, 128.8, 128.6, 128.4, 127.1, 126.2, 102.7 (C8 or C2), 102.4 (C8 or C2), 88.2 (C1), 50.3 (C6), 30.9 (C3), 22.5 (C5), 18.2 (C4); IR (CHCl<sub>3</sub>) cm<sup>-1</sup>: 3566, 1774; HRMS (DART) *m/z* calcd for C<sub>20</sub>H<sub>17</sub>O<sub>3</sub> [(M-OH)<sup>+</sup>]: 305.11777, found 305.11819.

### The cyclization of **4a** under thermodynamic conditions

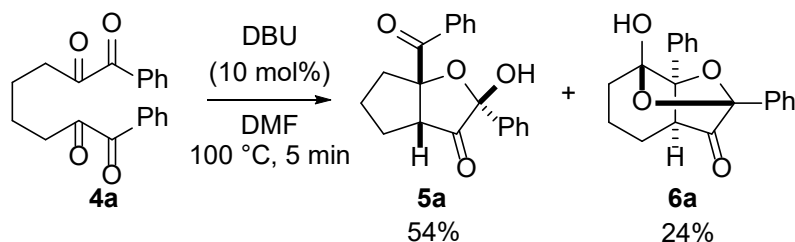

To a stirred solution of **4a** (20 mg, 62  $\mu\text{mol}$ ) in DMF (0.4 mL) was added a solution of DBU (0.9 mg, 6.2  $\mu\text{mol}$ ) in DMF (0.2 mL) at 100 °C, and the mixture was stirred at 100 °C for 5 min. The reaction was quenched by the addition of saturated aqueous  $\text{NH}_4\text{Cl}$  solution, and the resulting mixture was extracted with AcOEt (three times). The combined organic extracts were dried over anhydrous  $\text{Na}_2\text{SO}_4$ , filtered, and concentrated. The yields of **5a** (54%) and **6a** (24%) was determined by  $^1\text{H}$  NMR by using 1,3,5-trimethoxybenzene as an internal standard. The recovery of **4a** (2%) was also detected by  $^1\text{H}$  NMR.

### (1*R*\*,3*R*\*,5*S*\*)-5-acetyl-3-hydroxy-3-methyl-4-oxabicyclo[3.3.0]octan-2-one (**5b**)

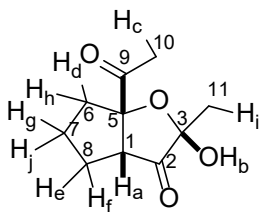

**5b**

66% yield; white solid; mp 111.0-114.5 °C (recryst from  $\text{CHCl}_3$ );  $^1\text{H}$  NMR (600 MHz,  $\text{CDCl}_3$ ):  $\delta$  3.31 (1H, d,  $J = 10.8$  Hz,  $\text{H}_a$ ), 3.13 (1H, brs,  $\text{H}_b$ ), 2.37 (3H, s,  $\text{H}_c$ ), 2.20-2.08 (2H, m,  $\text{H}_d$  and  $\text{H}_e$ ), 2.02-1.95 (1H, m,  $\text{H}_f$ ), 1.86-1.82 (1H, m,  $\text{H}_g$ ), 1.75-1.70 (1H, m,  $\text{H}_h$ ), 1.50 (3H, s,  $\text{H}_i$ ), 1.49-1.45 (1H, m,  $\text{H}_j$ );  $^{13}\text{C}$  NMR (150 MHz,  $\text{CDCl}_3$ ):  $\delta$  210.9 (C9), 209.9 (C2), 99.3 (C3), 95.6 (C5), 49.4 (C1), 38.7 (C6), 30.7 (C8), 26.1 (C10), 25.3 (C7), 20.7 (C11); IR ( $\text{CHCl}_3$ )  $\text{cm}^{-1}$ : 3586, 1766, 1712, 1214, HRMS (DART)  $m/z$  calcd for  $\text{C}_{10}\text{H}_{13}\text{O}_3$  [(M-OH) $^+$ ]: 181.08647, found 181.08666.

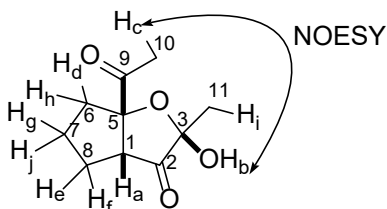

We could not purify compound **6b** by column chromatography on silica gel and preparative TLC on silica gel. Its presence and yield was deduced by  $^1\text{H}$  NMR analysis with reference to the data of compound **6a**.

### L-Proline-catalyzed enantioselective cyclization of **4a**

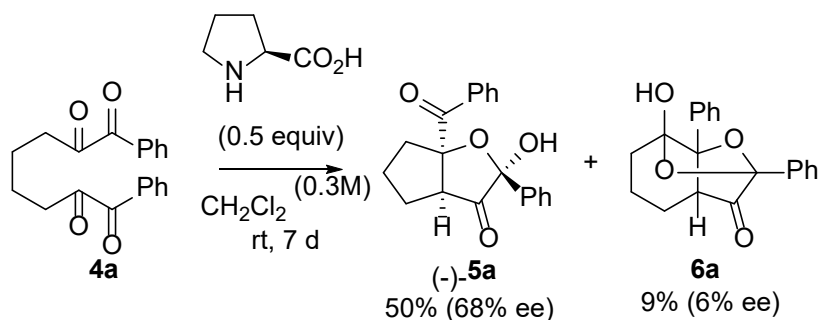

The mixture of **4a** (30 mg, 93  $\mu\text{mol}$ ) and L-proline (5.4 mg, 47  $\mu\text{mol}$ ) in dichloromethane (0.3 mL) was stirred at 25°C for 7 days. The reaction was quenched by adding water, and the resulting mixture was extracted with ethyl acetate. The combined extracts were washed with brine, dried over anhydrous  $\text{Na}_2\text{SO}_4$ , filtered, and concentrated. The yields of **5a** (50%), **6a** (9%), and recovered **4a** (2%) were determined by  $^1\text{H}$  NMR analysis of the crude product by using 1,3,5-trimethoxybenzene (15.6 mg) as an internal standard.  $[\alpha]_{\text{D}}^{21} = -34.8^\circ$  ( $c$  0.145,  $\text{CHCl}_3$ ) for **(-)-5a** (68% ee).

### Acetylation of **(-)-5a** and **6a**

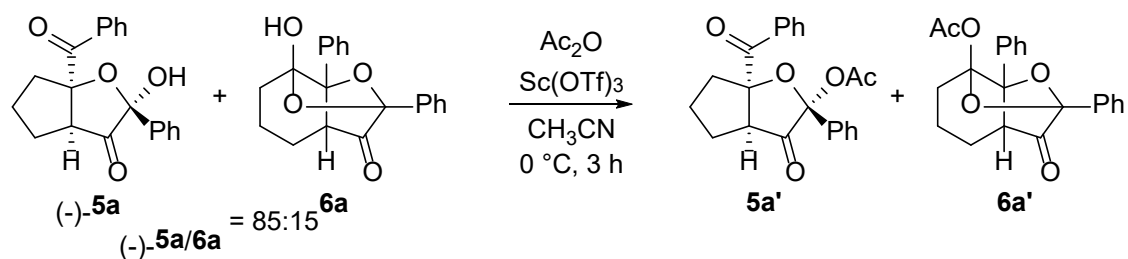

To a stirred solution of **5a** and **6a** (17.7 mg, 0.055 mmol, **5a/6a** = 85:15) in  $\text{Ac}_2\text{O}$  (0.1 mL, 1.06 mmol) was added a solution of  $\text{Sc}(\text{OTf})_3$  (1.8 mg, 3.6  $\mu\text{mol}$ ) in  $\text{CH}_3\text{CN}$  (0.05 mL) at 0 °C. The mixture was stirred at 0 °C for 3 h, and the reaction was quenched by adding a saturated aqueous solution of  $\text{NaHCO}_3$ . The resulting mixture was extracted with ether. The combined organic extracts were washed with brine, dried over anhydrous  $\text{Na}_2\text{SO}_4$ , filtered, and concentrated. The crude product was purified by preparative TLC ( $\text{CH}_2\text{Cl}_2$  and hexane/ethyl acetate = 5:1) to afford **5a'** (12.8 mg, 0.04 mmol) as a colorless solid and **6a'** (1.9 mg, 6.2  $\mu\text{mol}$ ).



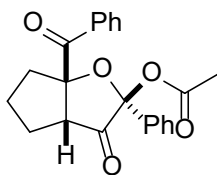

**5a'**

Mp: 153.0-155.0 °C (recryst. from CH<sub>2</sub>Cl<sub>2</sub>); <sup>1</sup>H NMR (400 MHz, CDCl<sub>3</sub>): δ 8.15 (2H, d, *J* = 7.2 Hz), 7.73-7.71 (2H, m), 7.55-7.41 (6H, m), 4.00 (1H, dd, *J* = 11.6, 2.8 Hz), 2.68 (1H, dd, *J* = 13.2, 6.0 Hz), 2.20-2.10 (2H, m), 1.94-1.85 (2H, m), 1.75-1.64 (1H, m), 1.59 (3H, s); <sup>13</sup>C NMR (100 MHz, CDCl<sub>3</sub>): δ 208.4, 200.8, 170.7, 135.5, 134.6, 132.6, 129.9, 129.5, 128.3, 128.0, 126.2, 101.1, 100.1, 54.4, 42.2, 31.4, 26.9, 19.9; IR (CHCl<sub>3</sub>) cm<sup>-1</sup>: 2927, 1766, 1738, 1246; HRMS (DART) *m/z* calcd for C<sub>20</sub>H<sub>17</sub>O<sub>3</sub> [(M-OAc)<sup>+</sup>]: 305.11777, found 305.11695; [α]<sub>D</sub><sup>22</sup> = +179° (*c* 0.058, CHCl<sub>3</sub>) for **5a'** (68% ee)

The optical purity of **5a'** was determined by chiral HPLC (Daicel chiralpac AD-H (15 cm × 0.46 cm ID), hexane/2-propanol = 99:1, flow rate = 1 mL/min, 254 nm) *t*<sub>major</sub> = 22.3 min, *t*<sub>minor</sub> = 31.7 min.

**(E)-5,6-dimethyldeca-5-en-2,8-diyne (12)**

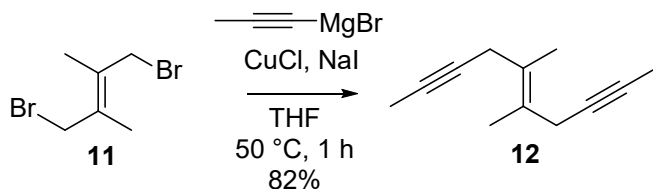

To a stirred mixture of NaI (282 mg, 1.88 mmol) and CuCl (326 mg, 3.29 mmol) was added 1-propynylmagnesium bromide (0.5 M solution in THF, 45 mL, 22.5 mmol) at 50 °C, and the resulting mixture was stirred at 50 °C for 30 min. The solution of **11** (680 mg, 2.81 mmol) in THF (14.1 mL) was then added at 50 °C, and the mixture was stirred at 50 °C for 1 h. The reaction was quenched by the addition with ice, and the mixture was filtered through a Celite pad. After evaporation of THF in the filtrate, the residue was extracted with ethyl acetate. The combined organic extracts were washed with brine, dried over anhydrous Na<sub>2</sub>SO<sub>4</sub>, filtered, and concentrated carefully because of the low boiling point of **12**. The crude product was purified by column chromatography on silica gel (hexane/ethyl acetate = 50 : 1) to afford **12** (369 mg, 2.31 mmol, 82%) as a colorless oil.

<sup>1</sup>H NMR (400 MHz, CDCl<sub>3</sub>): δ 2.88 (4H, m), 1.72 (12H, m); <sup>13</sup>C NMR (100 MHz, CDCl<sub>3</sub>): δ 125.5, 77.0, 75.5, 24.0, 17.9, 3.6; IR (CHCl<sub>3</sub>) cm<sup>-1</sup>: 3008, 2922, 1442, 1230; HRMS (ESI<sup>+</sup>) (*m/z*) calcd for C<sub>12</sub>H<sub>17</sub> [(M+H)<sup>+</sup>]: 161.13303, found 161.13235.

**(5*R*\*,6*R*\*)-5,6-dimethyldeca-2,8-diyne-5,6-diol (**13**)**

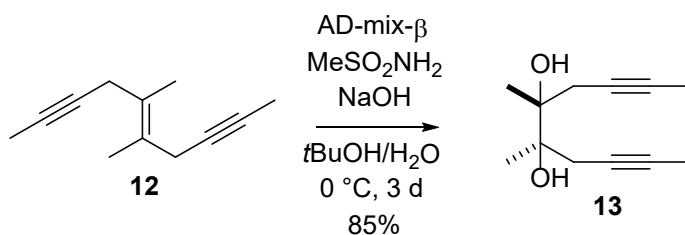

To a stirred solution of **12** (50 mg, 0.31 mmol) in *t*BuOH (1.6 mL) and H<sub>2</sub>O (1.6 mL) were added MeSO<sub>2</sub>NH<sub>2</sub> (89 mg, 0.94 mmol) and AD-mix- $\beta$  (1.06 g) at 0 °C. The pH of the reaction mixture was adjusted to 12 by adding the 2 M aqueous solution of NaOH (2.4 mL) at 0 °C. The resulting orange solution was stirred at 0 °C for 3 days. The reaction was quenched by the addition of the saturated aqueous solution of Na<sub>2</sub>S<sub>2</sub>O<sub>3</sub> and NaCl. The mixture was extracted with ethyl acetate. The organic extracts were washed with the saturated aqueous solution of NH<sub>4</sub>Cl and brine, dried over anhydrous Na<sub>2</sub>SO<sub>4</sub>, filtered, and concentrated. The crude product was purified by column chromatography on silica gel (hexane/ethyl acetate = 50:1 to 10:1) to afford **13** (52 mg, 0.27 mmol, 85%) as a white solid. M.p.: 57-59 °C; <sup>1</sup>H NMR (600 MHz, CDCl<sub>3</sub>):  $\delta$  2.73 (2H, br, s), 2.65 (2H, dq,  $J = 2.4$  Hz,  $J = 16.8$  Hz), 2.37 (2H, dq,  $J = 2.4$  Hz,  $J = 16.8$  Hz), 1.82 (6H, t,  $J = 2.4$  Hz), 1.27 (6H, s); <sup>13</sup>C NMR (150 MHz, CDCl<sub>3</sub>):  $\delta$  79.1, 75.5, 75.4, 28.1, 21.9, 3.5; IR (CHCl<sub>3</sub>) cm<sup>-1</sup>: 3546; HRMS (ESI+) ( $m/z$ ) calcd for C<sub>12</sub>H<sub>19</sub>O<sub>2</sub> [(M+H)<sup>+</sup>]: 195.13850, found 195.13864.

It was found that thus obtained **13** was racemic. The optical purity of **13** was determined by chiral HPLC analysis of its monobenzylated derivative **13'**.

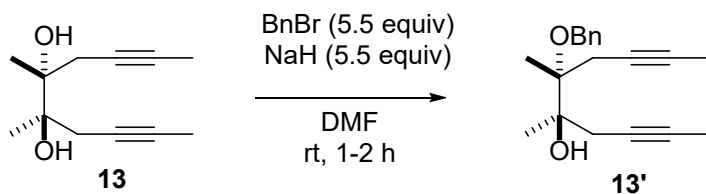

The optical purity of **13'** was determined by chiral HPLC (Daicel chiralpac OJ-H (15 cm  $\times$  0.46 cm ID), hexane/2-propanol = 9:1, flow rate = 1 mL/min, 254 nm)  $t = 3.9$  min,  $t = 4.5$  min.

**(5*R*\*,6*R*\*)-5,6-di(but-2-yn-1-yl)-3,3,8,8-tetraethyl-5,6-dimethyl-4,7-dioxo-3,8-disiladecane (14)**

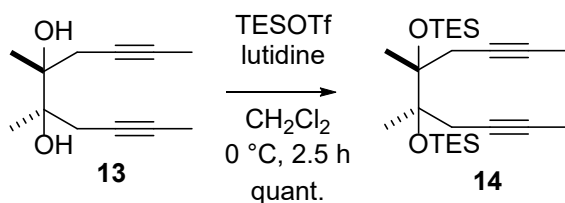

To a solution of diol **13** (389 mg, 2.0 mmol) in CH<sub>2</sub>Cl<sub>2</sub> (17 mL) cooled in an ice bath was added 2,6-lutidine (0.69 mL, 6.0 mmol) and triethylsilyl trifluoromethanesulfonate (1.35 mL, 6.0 mmol). Et<sub>2</sub>O was added to the reaction mixture, and the organic layer was separated. The organic layer was washed with saturated aqueous NaHCO<sub>3</sub>, brine, and dried over anhydrous Na<sub>2</sub>SO<sub>4</sub>. The solvent was removed under reduced pressure and the residue was purified by silica gel column chromatography (Hexane 100%) to furnish compound **14** (876 mg, quant.) as a colorless oil.

<sup>1</sup>H NMR (400 MHz, CDCl<sub>3</sub>): δ 2.58 (2H, dq, *J* = 2.4 Hz, *J* = 16.8 Hz), 2.41 (2H, dq, *J* = 2.4 Hz, *J* = 16.8 Hz), 1.79 (6H, t, *J* = 2.4 Hz), 1.30 (6H, s), 0.92-0.97 (18H, t, *J* = 8.0 Hz), 0.59-0.73 (12H, m, *J* = 8.0 Hz); <sup>13</sup>C NMR (100 MHz, CDCl<sub>3</sub>): δ 80.0, 78.3, 78.1, 27.7, 22.5, 7.3, 6.8, 3.8; IR (CHCl<sub>3</sub>) cm<sup>-1</sup>: 2051; Anal. calcd for C<sub>24</sub>H<sub>46</sub>O<sub>2</sub>Si<sub>2</sub>: C, 68.18; H, 10.97, found C, 66.37, H, 10.74.

**(5*R*\*,6*R*\*)-5,6-dimethyl-5,6-bis((triethylsilyl)oxy)decane-2,3,8,9-tetraone (15)**

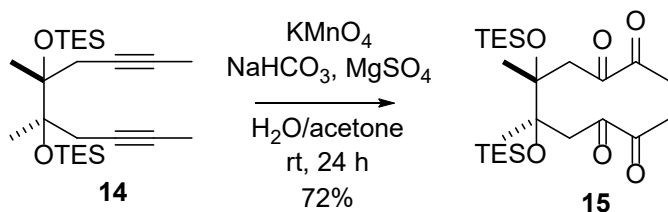

To a solution of **14** (31.4 mg, 0.074 mmol) in acetone (2.5 mL) and a buffer solution (1.0 mL) that was prepared from NaHCO<sub>3</sub> (4.93 mg), MgSO<sub>4</sub> (49.3 mg), and water (1.0 mL) was added at room temperature KMnO<sub>4</sub> (94 mg, 0.60 mmol) in portions over 24 h. After Celite filtration with ethyl acetate, the organic layer was separated. The aqueous layer was extracted with ethyl acetate and the combined organic layers were washed with brine and dried over anhydrous Na<sub>2</sub>SO<sub>4</sub>. The solvent was removed under reduced pressure and the residue was purified by column chromatography on silica gel (2% ethyl acetate/hexane) to afford tetraone **15** (26 mg, 72%) as a yellow oil.

$^1\text{H}$  NMR (600 MHz,  $\text{CDCl}_3$ ):  $\delta$  3.90 (2H, d,  $J = 13.6$  Hz), 2.40 (2H, d,  $J = 13.6$  Hz), 2.34 (6H, s), 1.42 (6H, s), 0.90 (18H, t,  $J = 7.6$  Hz), 0.55 (12H, q,  $J = 7.6$  Hz);  $^{13}\text{C}$  NMR (150 MHz,  $\text{CDCl}_3$ ):  $\delta$  196.9, 195.9, 81.8, 23.5, 22.9, 22.6, 14.1, 6.9, 6.5; IR ( $\text{CHCl}_3$ )  $\text{cm}^{-1}$ : 1708; Anal. calcd for  $\text{C}_{24}\text{H}_{46}\text{O}_6\text{Si}_2$ : C, 59.22; H, 9.53, found C, 58.93, H, 9.26.

**1-((1*R*\*,2*R*\*,3*R*\*,5*S*\*)-5-acetyl-5-hydroxy-2,3-dimethyl-2,3-bis((triethylsilyloxy)cyclopentyl)propane-1,2-dione (**16**)**

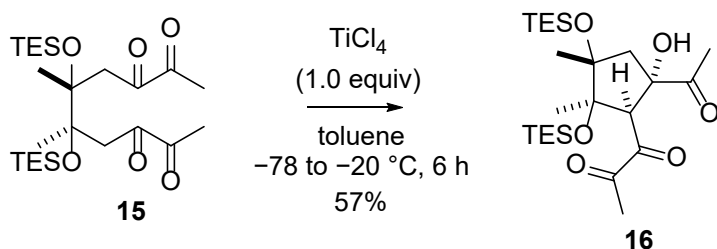

To a solution of tetraone **15** (144 mg, 0.3 mmol) in toluene (6 mL) was added  $\text{TiCl}_4$  (1.0 M solution of dichloromethane, 0.3 mL, 0.3 mmol) at  $-78$  °C under argon atmosphere. The mixture was stirred at  $-78$  °C for 1 h and at  $-20$  °C for 5 h, and the reaction was quenched by adding saturated aqueous solution of  $\text{NaHCO}_3$  at  $-20$  °C. The organic layer was separated, and the aqueous layer was extracted with ethyl acetate. The combined organic layers were washed with brine and dried over anhydrous  $\text{Na}_2\text{SO}_4$ . The solvent was removed under reduced pressure and the residue was purified by column chromatography on silica gel (2% ethyl acetate/hexane) to afford **16** (82.3 mg, 57%) as a yellow oil.

$^1\text{H}$  NMR (400 MHz,  $\text{CDCl}_3$ ):  $\delta$  4.80 (1H, s), 3.53 (1H, s), 2.40 (3H, s), 2.20 (1H, d,  $J = 14$  Hz), 2.14 (3H, s), 2.04 (1H, d,  $J = 14$  Hz), 1.46 (3H, s), 1.23 (3H, s), 0.97 (9H, t,  $J = 8.0$  Hz), 0.88 (9H, t,  $J = 8.0$  Hz), 0.59-0.68 (12H, m);  $^{13}\text{C}$  NMR (100 MHz,  $\text{CDCl}_3$ ):  $\delta$  207.9, 203.1, 194.8, 88.3, 87.9, 83.9, 62.4, 49.0, 23.8, 23.7, 20.0, 18.7, 7.2, 7.1, 6.6, 6.5; IR ( $\text{CHCl}_3$ )  $\text{cm}^{-1}$ : 3478, 1774, 1708, 1602; Anal. calcd for  $\text{C}_{24}\text{H}_{46}\text{O}_6\text{Si}_2$ : C, 59.22; H, 9.52, found C, 58.90, H, 9.80.

(±)-Nesteretal A (**1**)<sup>3</sup>

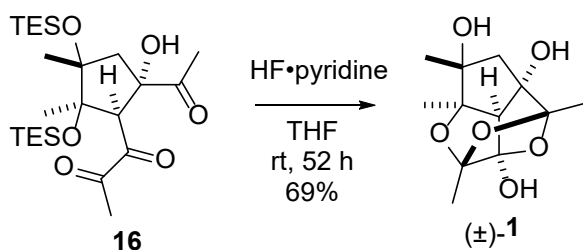

To a solution of **16** (35 mg, 0.071 mmol) in dry THF (0.35 mL) was added pyridine (0.096 mL, 1.20 mmol) and HF·pyridine (0.071 mL) at 0 °C. The mixture was stirred at the room temperature for 52 h. The reaction was quenched with saturated aqueous solution of NaHCO<sub>3</sub> and the resulting mixture was extracted with AcOEt (three times) and THF (twice). The combined organic extracts were washed with brine, dried over Na<sub>2</sub>SO<sub>4</sub>, and concentrated in vacuo. The residue was purified by column chromatography on silica gel (AcOEt 100%) to afford **1** (12.6 mg, 69%) as amorphous powder.

<sup>1</sup>H NMR (400 MHz, DMSO-*d*<sub>6</sub>): δ 7.67 (1H, s), 5.16 (1H, s), 4.54 (1H, s), 2.55 (1H, s), 2.11 (1H, d, *J* = 14 Hz), 1.51 (1H, d, *J* = 14 Hz), 1.20 (3H, s), 1.15 (3H, s), 1.13 (3H, s), 1.04 (3H, s); <sup>13</sup>C NMR (400 MHz, DMSO-*d*<sub>6</sub>): δ 111.6, 107.0, 104.1, 90.3, 90.2, 84.3, 64.3, 47.4, 21.0, 19.4, 18.1, 13.3.

The <sup>1</sup>H and <sup>13</sup>C NMR data of our synthesized **1** were accordance with the literature values.<sup>3</sup>

### X-ray Crystallography of **5a'**

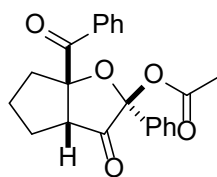

**5a'**

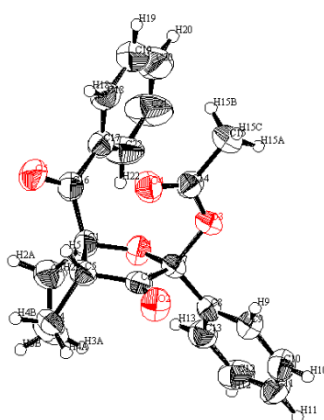

Crystallographic data (excluding structure factors) for **5a'** have been deposited with the Cambridge Crystallographic Data Centre as supplementary publication CCDC 2141535. Copies of the data can be obtained, free of charge, on application to CCDC, 12 Union Road, Cambridge CB2 1EZ, UK, (fax: +44-(0)1223-336033 or e-mail: [deposit@ccdc.cam.ac.uk](mailto:deposit@ccdc.cam.ac.uk)).

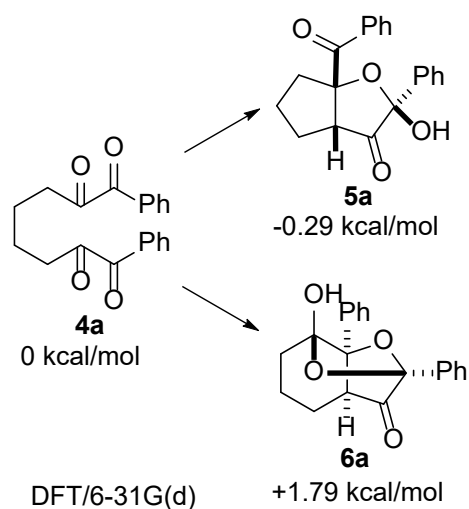

**Figure S1.** DFT calculations of **4a**, **5a**, and **6a**.

Geometry optimization was performed with Spartan '18<sup>4</sup> and the Gaussian 09 packages.<sup>5</sup> The ground-state geometries of all compounds were determined by means of the following successive steps: Conformational search with MMFF,<sup>6</sup> then DFT calculation with B3LYP functionals.<sup>7</sup> The basis set employed for DFT geometry optimization was the native 6-31G(d).

**Compound 4a: 0 kcal/mol**

SCF Done: E(RB3LYP) = -1073.85384809 A.U. after 7 cycles

Standard orientation:

| Center Number | Atomic Number | Atomic Type | Coordinates (Angstroms) |           |           |
|---------------|---------------|-------------|-------------------------|-----------|-----------|
|               |               |             | X                       | Y         | Z         |
| 1             | 6             | 0           | -1.716688               | -0.817644 | -4.095689 |
| 2             | 6             | 0           | -1.815898               | -0.677725 | -2.555082 |
| 3             | 6             | 0           | -0.509737               | -0.380902 | -1.847439 |
| 4             | 1             | 0           | 0.173944                | -1.221310 | -2.046677 |
| 5             | 1             | 0           | -0.045241               | 0.474665  | -2.354280 |
| 6             | 6             | 0           | -0.669222               | -0.141569 | -0.345993 |
| 7             | 1             | 0           | -1.152982               | -1.013888 | 0.111864  |
| 8             | 1             | 0           | -1.359637               | 0.696881  | -0.187874 |
| 9             | 6             | 0           | 0.669222                | 0.141569  | 0.345993  |
| 10            | 1             | 0           | 1.359637                | -0.696881 | 0.187874  |
| 11            | 1             | 0           | 1.152982                | 1.013888  | -0.111864 |

|    |   |   |           |           |           |
|----|---|---|-----------|-----------|-----------|
| 12 | 6 | 0 | 0.509737  | 0.380902  | 1.847439  |
| 13 | 1 | 0 | 0.045241  | -0.474665 | 2.354280  |
| 14 | 1 | 0 | -0.173944 | 1.221310  | 2.046677  |
| 15 | 6 | 0 | 1.815898  | 0.677725  | 2.555082  |
| 16 | 6 | 0 | 1.716688  | 0.817644  | 4.095689  |
| 17 | 6 | 0 | 2.646422  | 1.700239  | 4.851722  |
| 18 | 6 | 0 | 4.278074  | 3.357584  | 6.412408  |
| 19 | 6 | 0 | 2.514202  | 1.717848  | 6.252554  |
| 20 | 6 | 0 | 3.605692  | 2.526962  | 4.240945  |
| 21 | 6 | 0 | 4.414364  | 3.350502  | 5.023251  |
| 22 | 6 | 0 | 3.325533  | 2.537967  | 7.027259  |
| 23 | 1 | 0 | 1.765366  | 1.077909  | 6.707577  |
| 24 | 1 | 0 | 3.726947  | 2.513616  | 3.165523  |
| 25 | 1 | 0 | 5.154820  | 3.986004  | 4.545687  |
| 26 | 1 | 0 | 3.217830  | 2.543406  | 8.108380  |
| 27 | 1 | 0 | 4.912109  | 4.000867  | 7.016954  |
| 28 | 6 | 0 | -2.646422 | -1.700239 | -4.851722 |
| 29 | 6 | 0 | -4.278074 | -3.357584 | -6.412408 |
| 30 | 6 | 0 | -2.514202 | -1.717848 | -6.252554 |
| 31 | 6 | 0 | -3.605692 | -2.526962 | -4.240945 |
| 32 | 6 | 0 | -4.414364 | -3.350502 | -5.023251 |
| 33 | 6 | 0 | -3.325533 | -2.537967 | -7.027259 |
| 34 | 1 | 0 | -1.765366 | -1.077909 | -6.707577 |
| 35 | 1 | 0 | -3.726947 | -2.513616 | -3.165523 |
| 36 | 1 | 0 | -5.154820 | -3.986004 | -4.545687 |
| 37 | 1 | 0 | -3.217830 | -2.543406 | -8.108380 |
| 38 | 1 | 0 | -4.912109 | -4.000867 | -7.016954 |
| 39 | 8 | 0 | 0.851914  | 0.152215  | 4.651648  |
| 40 | 8 | 0 | 2.889346  | 0.741041  | 1.984483  |
| 41 | 8 | 0 | -2.889346 | -0.741041 | -1.984483 |
| 42 | 8 | 0 | -0.851914 | -0.152215 | -4.651648 |

---

**Compound 5a: -0.29 kcal/mol**

SCF Done: E(RB3LYP) = -1073.85431499 A.U. after 7 cycles

---



| Center<br>Number | Atomic<br>Number | Atomic<br>Type | Coordinates (Angstroms) |           |           |
|------------------|------------------|----------------|-------------------------|-----------|-----------|
|                  |                  |                | X                       | Y         | Z         |
| 1                | 6                | 0              | -0.692339               | 1.282122  | 0.304641  |
| 2                | 6                | 0              | 0.149632                | 2.298628  | -0.509421 |
| 3                | 6                | 0              | 0.477207                | 3.474380  | 0.444444  |
| 4                | 6                | 0              | 0.274261                | 2.890349  | 1.853140  |
| 5                | 6                | 0              | -0.933346               | 1.953298  | 1.675026  |
| 6                | 1                | 0              | -0.375033               | 2.633047  | -1.408229 |
| 7                | 1                | 0              | 1.484388                | 3.863377  | 0.265529  |
| 8                | 1                | 0              | -0.232482               | 4.290817  | 0.269167  |
| 9                | 1                | 0              | 0.103734                | 3.657257  | 2.615628  |
| 10               | 1                | 0              | 1.153867                | 2.310016  | 2.157132  |
| 11               | 1                | 0              | -1.858241               | 2.540878  | 1.624024  |
| 12               | 1                | 0              | -1.047481               | 1.210600  | 2.470478  |
| 13               | 8                | 0              | 0.180963                | 0.138039  | 0.515801  |
| 14               | 6                | 0              | 1.372663                | 1.495974  | -0.932058 |
| 15               | 8                | 0              | 2.393052                | 1.920570  | -1.413805 |
| 16               | 6                | 0              | 1.075249                | 0.011578  | -0.572803 |
| 17               | 6                | 0              | -2.016936               | 0.899701  | -0.391381 |
| 18               | 8                | 0              | 0.420909                | -0.488003 | -1.725970 |
| 19               | 1                | 0              | 0.184592                | -1.414861 | -1.546308 |
| 20               | 8                | 0              | -2.526357               | 1.725196  | -1.136243 |
| 21               | 6                | 0              | 2.277230                | -0.811986 | -0.171948 |
| 22               | 6                | 0              | 4.554735                | -2.299929 | 0.495474  |
| 23               | 6                | 0              | 2.576743                | -1.078833 | 1.168880  |
| 24               | 6                | 0              | 3.131129                | -1.286218 | -1.176715 |
| 25               | 6                | 0              | 4.264083                | -2.026833 | -0.842790 |
| 26               | 6                | 0              | 3.709009                | -1.824667 | 1.498946  |
| 27               | 1                | 0              | 1.918198                | -0.708582 | 1.946568  |
| 28               | 1                | 0              | 2.900893                | -1.070591 | -2.214754 |
| 29               | 1                | 0              | 4.921084                | -2.389302 | -1.628777 |
| 30               | 1                | 0              | 3.929536                | -2.034359 | 2.542309  |
| 31               | 1                | 0              | 5.437246                | -2.878788 | 0.754725  |
| 32               | 6                | 0              | -2.718320               | -0.395327 | -0.109082 |
| 33               | 6                | 0              | -4.215476               | -2.727674 | 0.339408  |

|    |   |   |           |           |           |
|----|---|---|-----------|-----------|-----------|
| 34 | 6 | 0 | -3.864946 | -0.670671 | -0.875519 |
| 35 | 6 | 0 | -2.333763 | -1.306726 | 0.889320  |
| 36 | 6 | 0 | -3.084287 | -2.461652 | 1.112232  |
| 37 | 6 | 0 | -4.603719 | -1.828595 | -0.658465 |
| 38 | 1 | 0 | -4.157571 | 0.046043  | -1.635442 |
| 39 | 1 | 0 | -1.446128 | -1.123959 | 1.480772  |
| 40 | 1 | 0 | -2.780517 | -3.157013 | 1.890061  |
| 41 | 1 | 0 | -5.484176 | -2.030806 | -1.262314 |
| 42 | 1 | 0 | -4.793294 | -3.631707 | 0.513192  |

**Compound 6a: +1.79 kcal/mol**

SCF Done: E(RB3LYP) = -1073.85099898 A.U. after 6 cycles

Standard orientation:

| Center<br>Number | Atomic<br>Number | Atomic<br>Type | Coordinates (Angstroms) |           |           |
|------------------|------------------|----------------|-------------------------|-----------|-----------|
|                  |                  |                | X                       | Y         | Z         |
| 1                | 6                | 0              | 0.688341                | 0.935619  | -1.340639 |
| 2                | 6                | 0              | 0.843307                | 3.159549  | -0.123442 |
| 3                | 6                | 0              | 0.560584                | 0.985176  | 1.168302  |
| 4                | 6                | 0              | 1.120925                | 2.405822  | 1.183207  |
| 5                | 6                | 0              | 0.973197                | 0.102800  | -0.056621 |
| 6                | 6                | 0              | 1.285555                | 2.349966  | -1.351371 |
| 7                | 1                | 0              | 1.359317                | 4.126246  | -0.107157 |
| 8                | 1                | 0              | 0.678143                | 2.923589  | 2.040699  |
| 9                | 1                | 0              | 0.973995                | 2.853885  | -2.273167 |
| 10               | 1                | 0              | 1.034575                | 0.369147  | -2.213327 |
| 11               | 1                | 0              | -0.228742               | 3.375041  | -0.195496 |
| 12               | 1                | 0              | 2.200064                | 2.349480  | 1.366587  |
| 13               | 1                | 0              | 2.380522                | 2.270191  | -1.379328 |
| 14               | 8                | 0              | -0.146697               | -0.842562 | -0.044478 |
| 15               | 6                | 0              | -0.848558               | 0.925047  | -1.341171 |
| 16               | 6                | 0              | -1.198166               | 0.099249  | -0.077814 |
| 17               | 8                | 0              | -0.877285               | 1.036784  | 0.980521  |
| 18               | 8                | 0              | -1.595902               | 1.484372  | -2.105987 |

|    |   |   |           |           |           |
|----|---|---|-----------|-----------|-----------|
| 19 | 8 | 0 | 0.849961  | 0.394195  | 2.399348  |
| 20 | 1 | 0 | 0.488806  | -0.508966 | 2.370614  |
| 21 | 6 | 0 | 2.277868  | -0.655884 | -0.045608 |
| 22 | 6 | 0 | 4.693542  | -2.088808 | -0.188770 |
| 23 | 6 | 0 | 2.434711  | -1.709574 | -0.960536 |
| 24 | 6 | 0 | 3.343726  | -0.340354 | 0.806066  |
| 25 | 6 | 0 | 4.544768  | -1.049550 | 0.728285  |
| 26 | 6 | 0 | 3.629701  | -2.421750 | -1.030476 |
| 27 | 1 | 0 | 1.605990  | -1.979963 | -1.608259 |
| 28 | 1 | 0 | 3.233890  | 0.436203  | 1.552603  |
| 29 | 1 | 0 | 5.361555  | -0.790537 | 1.396562  |
| 30 | 1 | 0 | 3.729588  | -3.237617 | -1.741297 |
| 31 | 1 | 0 | 5.627942  | -2.640774 | -0.243850 |
| 32 | 6 | 0 | -2.565122 | -0.484199 | 0.060307  |
| 33 | 6 | 0 | -5.145767 | -1.535181 | 0.274287  |
| 34 | 6 | 0 | -3.663083 | 0.374322  | 0.194193  |
| 35 | 6 | 0 | -2.762526 | -1.868118 | 0.026774  |
| 36 | 6 | 0 | -4.051898 | -2.390564 | 0.135059  |
| 37 | 6 | 0 | -4.948586 | -0.152628 | 0.303720  |
| 38 | 1 | 0 | -3.506362 | 1.447657  | 0.215483  |
| 39 | 1 | 0 | -1.908046 | -2.528115 | -0.079902 |
| 40 | 1 | 0 | -4.200156 | -3.466860 | 0.112256  |
| 41 | 1 | 0 | -5.797491 | 0.517093  | 0.410436  |
| 42 | 1 | 0 | -6.149318 | -1.943635 | 0.358792  |

---

### Determination of the absolute configuration of (-)-**5a**

The absolute configuration of (-)-**5a** was determined by comparing the experimental and calculated ECD spectra using the TDDFT method at the B3LYP/6-31+G(d) level. The calculated ECD curves of (1*S*,3*S*,5*R*)-**5a** was in good agreement with the experimental one of (-)-**5a** (Figure S6).

**Figure S2.** UV spectrum of compound **5a**<sup>a</sup>

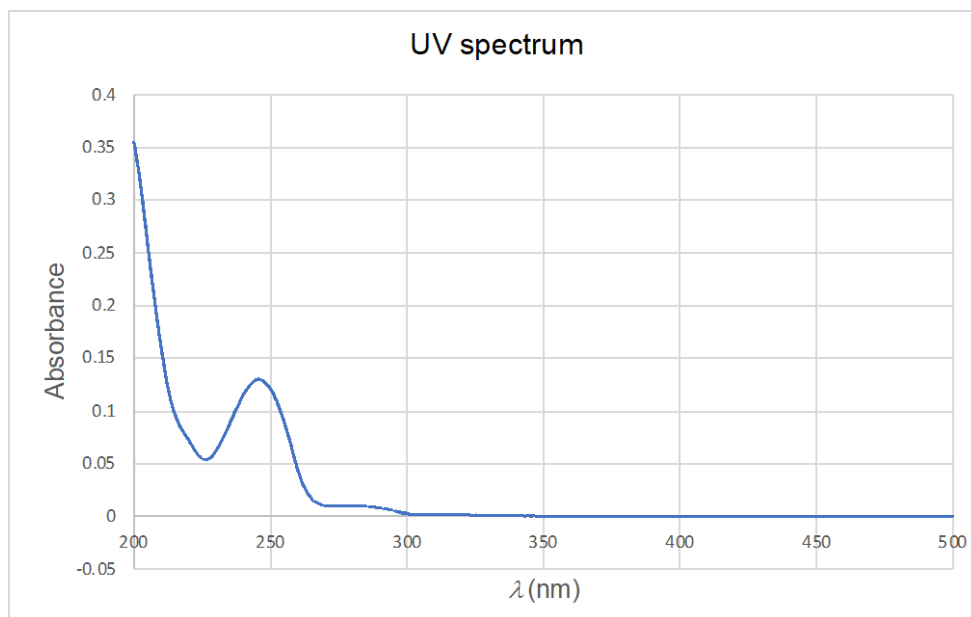

<sup>a</sup>Conditions: A  $1.33 \times 10^{-5}$  M of **5a** in MeCN at 20 °C.

**Figure S3.** ECD spectrum of compound (-)-**5a**<sup>b</sup>

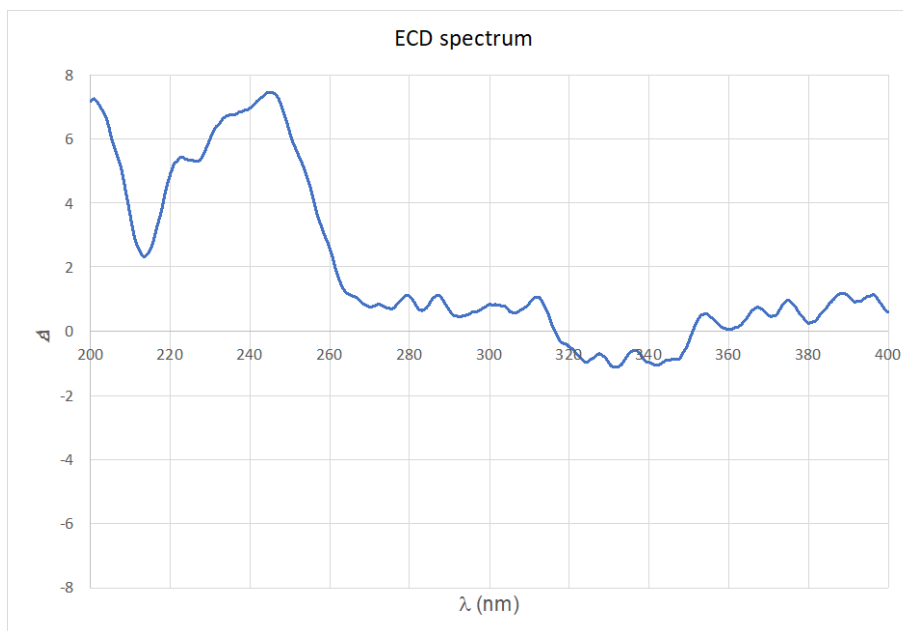

<sup>b</sup>Conditions: A  $1.33 \times 10^{-5}$  M solution of (-)-**5a** (68% ee) in MeCN at 20 °C.

**Computational experiments:** The all conformers of (1*S*,3*S*,5*R*)-**5a** and (1*R*,3*R*,5*S*)-**5a** were systematically generated by Spartan '18<sup>1</sup> package using MMFF molecular force field<sup>6</sup> within an energy from the global minima to 9.56 kcal/mol (40 kJ/mol). These conformers were optimized by Gaussian 09<sup>2</sup> using DFT calculation at B3LYP/6-31G(d) level and an energy minimum of each conformers was confirmed by frequency calculation at the same level. ECD calculations for all of the optimized conformers were carried out by Gaussian 09 using TDDFT calculation at B3LYP/6-31G(d) level by considering the first 20 excitations. The ECD spectra corrected with regard to Boltzmann weighted average of each conformer at 20 °C were produced by excel program (UV-VIS peak half-width at height: 0.333 eV).

## Results

| conformers                                          | G (hartree)    | $\Delta G$ (kcal/mol) | Boltzmann distribution (%) |
|-----------------------------------------------------|----------------|-----------------------|----------------------------|
| (1 <i>R</i> ,3 <i>R</i> ,5 <i>S</i> )- <b>5a-01</b> | -1073.85431497 | 0                     | 97.73                      |
| (1 <i>R</i> ,3 <i>R</i> ,5 <i>S</i> )- <b>5a-02</b> | -1073.85034767 | 2.49                  | 1.36                       |
| (1 <i>R</i> ,3 <i>R</i> ,5 <i>S</i> )- <b>5a-03</b> | -1073.84997352 | 2.72                  | 0.91                       |
| (1 <i>S</i> ,3 <i>S</i> ,5 <i>R</i> )- <b>5a-01</b> | -1073.85431495 | 0                     | 97.73                      |
| (1 <i>S</i> ,3 <i>S</i> ,5 <i>R</i> )- <b>5a-02</b> | -1073.85034767 | 2.49                  | 1.36                       |
| (1 <i>S</i> ,3 <i>S</i> ,5 <i>R</i> )- <b>5a-03</b> | -1073.84997351 | 2.72                  | 0.91                       |

**Figure S4.** Structures of (1*R*,3*R*,5*S*)-**5a** and (1*S*,3*S*,5*R*)-**5a**.

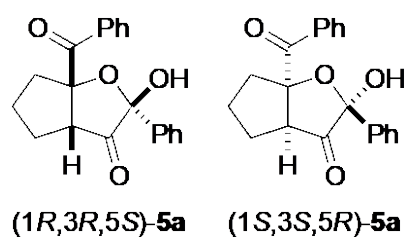

**Figure S5.** Optimized conformers of (1*R*,3*R*,5*S*)-**5a** and (1*S*,3*S*,5*R*)-**5a** within an energy from global minima to 9.56 kcal/mol

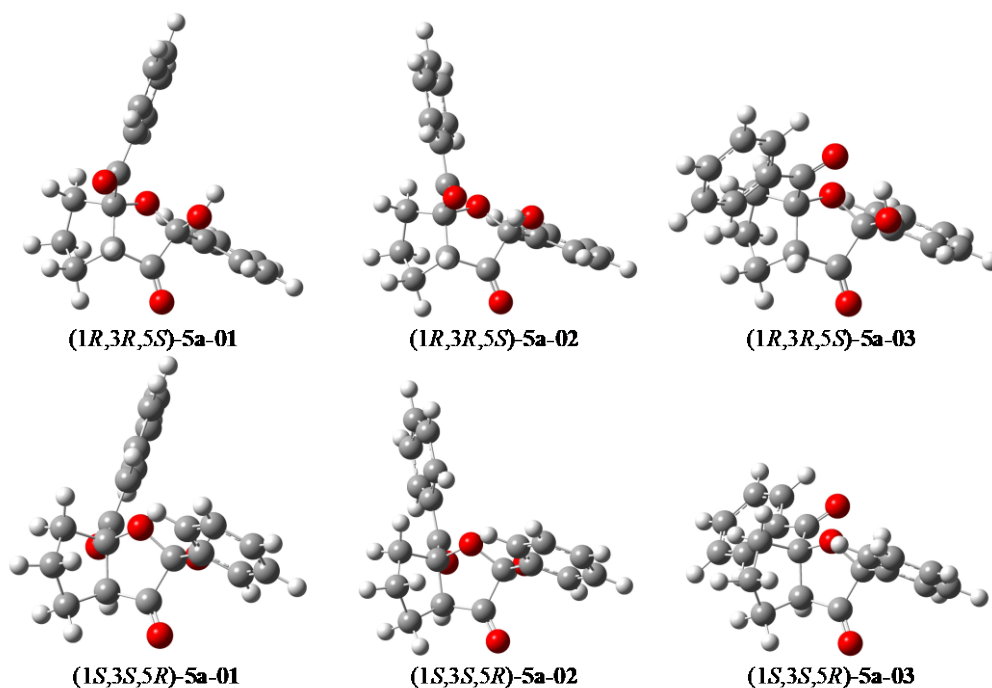

**Figure S6.** Superimposed ECD spectra of the experimental spectrum of (-)-**5a** and the calculated spectra of (1*R*,3*R*,5*S*)-**5a** and (1*S*,3*S*,5*R*)-**5a**.<sup>c,d</sup>

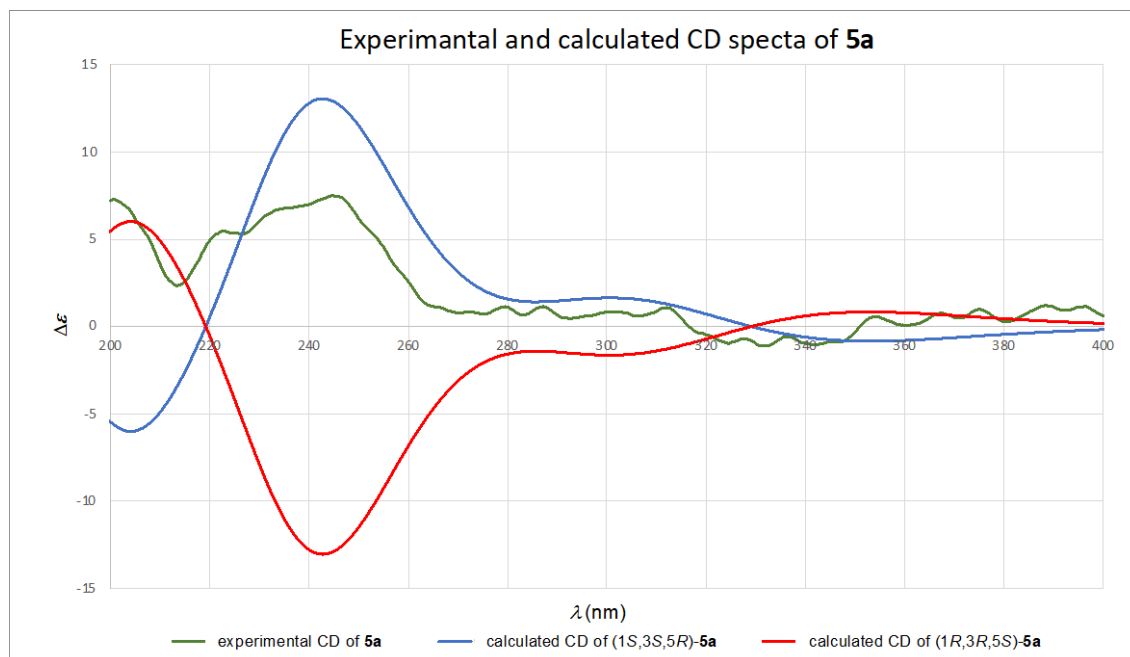

<sup>c</sup>Conditions: The experimental ECD spectrum was measured using a  $1.33 \times 10^{-5}$  M solution of (-)-**5a** (68% ee) in MeCN at 20 °C. <sup>d</sup>The calculation of ECD spectra were carried out with the B3LYP/6-

31G(d).

**Results of optimization of each conformers**

Conformer (1*R*,3*R*,5*S*)-**5a-01**:  $\Delta G = 0$  kcal/mol

SCF Done: E(RB3LYP) = -1073.85431497 A.U. after 7 cycles

Standard orientation:

| Center<br>Number | Atomic<br>Number | Atomic<br>Type | Coordinates (Angstroms) |           |           |
|------------------|------------------|----------------|-------------------------|-----------|-----------|
|                  |                  |                | X                       | Y         | Z         |
| 1                | 1                | 0              | -0.374907               | 2.632781  | -1.408405 |
| 2                | 6                | 0              | 0.149593                | 2.298654  | -0.509387 |
| 3                | 6                | 0              | 0.476641                | 3.474586  | 0.444388  |
| 4                | 6                | 0              | 0.273861                | 2.890515  | 1.853089  |
| 5                | 6                | 0              | -0.933505               | 1.953166  | 1.674967  |
| 6                | 6                | 0              | -0.692358               | 1.282031  | 0.304580  |
| 7                | 1                | 0              | -0.233384               | 4.290720  | 0.269049  |
| 8                | 1                | 0              | 1.483676                | 3.863960  | 0.265479  |
| 9                | 1                | 0              | 1.153622                | 2.310394  | 2.157058  |
| 10               | 1                | 0              | 0.103168                | 3.657362  | 2.615602  |
| 11               | 1                | 0              | -1.858536               | 2.540534  | 1.623968  |
| 12               | 1                | 0              | -1.047491               | 1.210453  | 2.470427  |
| 13               | 6                | 0              | 1.372932                | 1.496228  | -0.931576 |
| 14               | 8                | 0              | 0.180973                | 0.137979  | 0.515718  |
| 15               | 6                | 0              | 1.075413                | 0.011703  | -0.572808 |
| 16               | 8                | 0              | 0.421224                | -0.487542 | -1.726162 |
| 17               | 1                | 0              | 0.185216                | -1.414574 | -1.546997 |
| 18               | 6                | 0              | 2.277305                | -0.811982 | -0.171987 |
| 19               | 6                | 0              | 4.554695                | -2.300142 | 0.495373  |
| 20               | 6                | 0              | 3.131348                | -1.285967 | -1.176747 |
| 21               | 6                | 0              | 2.576623                | -1.079195 | 1.168814  |
| 22               | 6                | 0              | 3.708829                | -1.825128 | 1.498848  |
| 23               | 6                | 0              | 4.264243                | -2.026692 | -0.842859 |
| 24               | 1                | 0              | 2.901289                | -1.070057 | -2.214769 |
| 25               | 1                | 0              | 1.917972                | -0.709140 | 1.946506  |

|    |   |   |           |           |           |
|----|---|---|-----------|-----------|-----------|
| 26 | 1 | 0 | 3.929207  | -2.035098 | 2.542186  |
| 27 | 1 | 0 | 4.921352  | -2.388959 | -1.628848 |
| 28 | 1 | 0 | 5.437161  | -2.879079 | 0.754608  |
| 29 | 8 | 0 | 2.393582  | 1.921040  | -1.412571 |
| 30 | 6 | 0 | -2.016921 | 0.899571  | -0.391507 |
| 31 | 8 | 0 | -2.526313 | 1.725008  | -1.136450 |
| 32 | 6 | 0 | -2.718342 | -0.395436 | -0.109159 |
| 33 | 6 | 0 | -4.215528 | -2.727761 | 0.339342  |
| 34 | 6 | 0 | -3.865002 | -0.670739 | -0.875554 |
| 35 | 6 | 0 | -2.333760 | -1.306863 | 0.889203  |
| 36 | 6 | 0 | -3.084297 | -2.461778 | 1.112122  |
| 37 | 6 | 0 | -4.603797 | -1.828649 | -0.658489 |
| 38 | 1 | 0 | -4.157649 | 0.045994  | -1.635450 |
| 39 | 1 | 0 | -1.446106 | -1.124133 | 1.480638  |
| 40 | 1 | 0 | -2.780506 | -3.157168 | 1.889916  |
| 41 | 1 | 0 | -5.484286 | -2.030822 | -1.262305 |
| 42 | 1 | 0 | -4.793354 | -3.631787 | 0.513135  |

-----

Conformers (1*R*,3*R*,5*S*)-**5a-02**:  $\Delta G = 2.49$  kcal/mol

SCF Done: E(RB3LYP) = -1073.85034767 A.U. after 7 cycles

Standard orientation:

| Center<br>Number | Atomic<br>Number | Atomic<br>Type | Coordinates (Angstroms) |          |           |
|------------------|------------------|----------------|-------------------------|----------|-----------|
|                  |                  |                | X                       | Y        | Z         |
| 1                | 1                | 0              | -0.267913               | 2.706354 | -1.147501 |
| 2                | 6                | 0              | 0.171823                | 2.236853 | -0.263021 |
| 3                | 6                | 0              | 0.331842                | 3.232384 | 0.911956  |
| 4                | 6                | 0              | 0.017325                | 2.394962 | 2.163337  |
| 5                | 6                | 0              | -1.102736               | 1.453467 | 1.688777  |
| 6                | 6                | 0              | -0.687105               | 1.058983 | 0.259316  |
| 7                | 1                | 0              | -0.398068               | 4.043350 | 0.806161  |
| 8                | 1                | 0              | 1.329074                | 3.682805 | 0.916349  |
| 9                | 1                | 0              | 0.895263                | 1.807461 | 2.458147  |
| 10               | 1                | 0              | -0.277680               | 3.002803 | 3.024608  |
| 11               | 1                | 0              | -2.057468               | 1.994874 | 1.646359  |



|    |   |   |           |           |           |
|----|---|---|-----------|-----------|-----------|
| 12 | 1 | 0 | -1.249257 | 0.578821  | 2.327236  |
| 13 | 6 | 0 | 1.480579  | 1.569421  | -0.678101 |
| 14 | 8 | 0 | 0.209864  | -0.088511 | 0.329132  |
| 15 | 6 | 0 | 1.246324  | 0.032671  | -0.640610 |
| 16 | 8 | 0 | 0.839146  | -0.402333 | -1.922051 |
| 17 | 1 | 0 | 0.159879  | 0.204363  | -2.267460 |
| 18 | 6 | 0 | 2.454064  | -0.769176 | -0.219050 |
| 19 | 6 | 0 | 4.759904  | -2.167356 | 0.537130  |
| 20 | 6 | 0 | 3.433872  | -1.079271 | -1.169614 |
| 21 | 6 | 0 | 2.639026  | -1.155584 | 1.112444  |
| 22 | 6 | 0 | 3.786322  | -1.855884 | 1.487018  |
| 23 | 6 | 0 | 4.580326  | -1.776384 | -0.791195 |
| 24 | 1 | 0 | 3.288323  | -0.778874 | -2.200841 |
| 25 | 1 | 0 | 1.878516  | -0.918654 | 1.848102  |
| 26 | 1 | 0 | 3.917139  | -2.159229 | 2.522479  |
| 27 | 1 | 0 | 5.334373  | -2.014935 | -1.536474 |
| 28 | 1 | 0 | 5.653788  | -2.711924 | 0.829888  |
| 29 | 8 | 0 | 2.509607  | 2.126511  | -0.973497 |
| 30 | 6 | 0 | -1.853640 | 0.672079  | -0.684923 |
| 31 | 8 | 0 | -1.950676 | 1.222773  | -1.776925 |
| 32 | 6 | 0 | -2.848300 | -0.358950 | -0.267987 |
| 33 | 6 | 0 | -4.804542 | -2.246771 | 0.405833  |
| 34 | 6 | 0 | -4.100840 | -0.345741 | -0.906100 |
| 35 | 6 | 0 | -2.579586 | -1.342291 | 0.698887  |
| 36 | 6 | 0 | -3.554549 | -2.283342 | 1.026770  |
| 37 | 6 | 0 | -5.076383 | -1.275905 | -0.562796 |
| 38 | 1 | 0 | -4.288695 | 0.406433  | -1.665347 |
| 39 | 1 | 0 | -1.598015 | -1.398041 | 1.154020  |
| 40 | 1 | 0 | -3.334770 | -3.050727 | 1.763695  |
| 41 | 1 | 0 | -6.046391 | -1.249636 | -1.051452 |
| 42 | 1 | 0 | -5.563995 | -2.977764 | 0.670342  |

-----

Conformers (1*R*,3*R*,5*S*)-**5a-03**:  $\Delta G = 2.72$  kcal/mol

SCF Done: E(RB3LYP) = -1073.84997351 A.U. after 7 cycles

Standard orientation:

-----

| Center<br>Number | Atomic<br>Number | Atomic<br>Type | Coordinates (Angstroms) |           |           |
|------------------|------------------|----------------|-------------------------|-----------|-----------|
|                  |                  |                | X                       | Y         | Z         |
| 1                | 1                | 0              | 1.036000                | 0.810416  | 1.709974  |
| 2                | 6                | 0              | 0.359749                | 1.102314  | 0.900967  |
| 3                | 6                | 0              | 0.455676                | 2.612079  | 0.564169  |
| 4                | 6                | 0              | 0.212943                | 2.685085  | -0.953917 |
| 5                | 6                | 0              | 0.901862                | 1.419214  | -1.497276 |
| 6                | 6                | 0              | 0.586666                | 0.336564  | -0.439701 |
| 7                | 1                | 0              | 1.455165                | 2.992096  | 0.808501  |
| 8                | 1                | 0              | -0.262195               | 3.187811  | 1.156590  |
| 9                | 1                | 0              | -0.861429               | 2.645413  | -1.166945 |
| 10               | 1                | 0              | 0.604163                | 3.603080  | -1.403814 |
| 11               | 1                | 0              | 1.981146                | 1.576399  | -1.581898 |
| 12               | 1                | 0              | 0.533739                | 1.099118  | -2.476508 |
| 13               | 6                | 0              | -1.065233               | 0.696069  | 1.308297  |
| 14               | 8                | 0              | -0.709795               | -0.198674 | -0.794013 |
| 15               | 6                | 0              | -1.493698               | -0.444920 | 0.354236  |
| 16               | 8                | 0              | -1.073385               | -1.621752 | 1.025587  |
| 17               | 1                | 0              | -0.552950               | -2.124411 | 0.366006  |
| 18               | 6                | 0              | -2.962142               | -0.466042 | -0.007147 |
| 19               | 6                | 0              | -5.706045               | -0.456696 | -0.568868 |
| 20               | 6                | 0              | -3.856398               | -1.135825 | 0.835330  |
| 21               | 6                | 0              | -3.449542               | 0.211527  | -1.130129 |
| 22               | 6                | 0              | -4.816282               | 0.211533  | -1.411394 |
| 23               | 6                | 0              | -5.222283               | -1.129582 | 0.554933  |
| 24               | 1                | 0              | -3.471575               | -1.666897 | 1.698980  |
| 25               | 1                | 0              | -2.756147               | 0.719954  | -1.791538 |
| 26               | 1                | 0              | -5.184802               | 0.731309  | -2.292044 |
| 27               | 1                | 0              | -5.909328               | -1.653802 | 1.213984  |
| 28               | 1                | 0              | -6.770637               | -0.455210 | -0.788068 |
| 29               | 8                | 0              | -1.713844               | 1.195307  | 2.193082  |
| 30               | 6                | 0              | 1.599873                | -0.835427 | -0.390741 |
| 31               | 8                | 0              | 1.198177                | -1.981990 | -0.542252 |
| 32               | 6                | 0              | 3.067445                | -0.599075 | -0.187062 |
| 33               | 6                | 0              | 5.839828                | -0.359241 | 0.200833  |

|    |   |   |          |           |           |
|----|---|---|----------|-----------|-----------|
| 34 | 6 | 0 | 3.925449 | -1.683612 | -0.443405 |
| 35 | 6 | 0 | 3.623493 | 0.605522  | 0.274680  |
| 36 | 6 | 0 | 4.999229 | 0.721042  | 0.471933  |
| 37 | 6 | 0 | 5.298608 | -1.563067 | -0.259175 |
| 38 | 1 | 0 | 3.487980 | -2.614681 | -0.786704 |
| 39 | 1 | 0 | 2.992901 | 1.457734  | 0.496824  |
| 40 | 1 | 0 | 5.412986 | 1.656345  | 0.838156  |
| 41 | 1 | 0 | 5.948531 | -2.407755 | -0.469751 |
| 42 | 1 | 0 | 6.912054 | -0.264830 | 0.349645  |

-----

Conformer (1*S*,3*S*,5*R*)-**5a-01**:  $\Delta G = 0$  kcal/mol

SCF Done: E(RB3LYP) = -1073.85431495 A.U. after 7 cycles

Standard orientation:

| Center<br>Number | Atomic<br>Number | Atomic<br>Type | Coordinates (Angstroms) |           |           |
|------------------|------------------|----------------|-------------------------|-----------|-----------|
|                  |                  |                | X                       | Y         | Z         |
| 1                | 6                | 0              | 0.692241                | 1.281922  | 0.304552  |
| 2                | 6                | 0              | -0.149751               | 2.298587  | -0.509322 |
| 3                | 6                | 0              | -0.476842               | 3.474462  | 0.444483  |
| 4                | 6                | 0              | -0.274061               | 2.890281  | 1.853146  |
| 5                | 6                | 0              | 0.933304                | 1.952952  | 1.674992  |
| 6                | 1                | 0              | 0.374753                | 2.632728  | -1.408341 |
| 7                | 1                | 0              | 0.233124                | 4.290660  | 0.269209  |
| 8                | 1                | 0              | -1.483904               | 3.863786  | 0.265604  |
| 9                | 1                | 0              | -1.153856               | 2.310178  | 2.157063  |
| 10               | 1                | 0              | -0.103376               | 3.657079  | 2.615713  |
| 11               | 1                | 0              | 1.047280                | 1.210182  | 2.470401  |
| 12               | 1                | 0              | 1.858344                | 2.540317  | 1.624061  |
| 13               | 8                | 0              | -0.180832               | 0.137693  | 0.515455  |
| 14               | 6                | 0              | -1.373054               | 1.496130  | -0.931525 |
| 15               | 6                | 0              | -1.075399               | 0.011534  | -0.573022 |
| 16               | 6                | 0              | -2.277271               | -0.812125 | -0.172047 |
| 17               | 6                | 0              | -4.554690               | -2.300118 | 0.495521  |
| 18               | 6                | 0              | -3.131284               | -1.286294 | -1.176748 |
| 19               | 6                | 0              | -2.576610               | -1.079098 | 1.168796  |

|    |   |   |           |           |           |
|----|---|---|-----------|-----------|-----------|
| 20 | 6 | 0 | -3.708835 | -1.824941 | 1.498935  |
| 21 | 6 | 0 | -4.264205 | -2.026943 | -0.842753 |
| 22 | 1 | 0 | -2.901208 | -1.070554 | -2.214801 |
| 23 | 1 | 0 | -1.917909 | -0.708944 | 1.946401  |
| 24 | 1 | 0 | -3.929270 | -2.034728 | 2.542298  |
| 25 | 1 | 0 | -4.921304 | -2.389354 | -1.628684 |
| 26 | 1 | 0 | -5.437158 | -2.879004 | 0.754866  |
| 27 | 8 | 0 | -0.421407 | -0.487528 | -1.726454 |
| 28 | 1 | 0 | -0.185661 | -1.414689 | -1.547635 |
| 29 | 8 | 0 | -2.393829 | 1.920902  | -1.412289 |
| 30 | 6 | 0 | 2.016830  | 0.899634  | -0.391644 |
| 31 | 6 | 0 | 2.718424  | -0.395288 | -0.109207 |
| 32 | 6 | 0 | 4.216048  | -2.727272 | 0.339575  |
| 33 | 6 | 0 | 3.864872  | -0.670707 | -0.875887 |
| 34 | 6 | 0 | 2.334252  | -1.306457 | 0.889549  |
| 35 | 6 | 0 | 3.085025  | -2.461180 | 1.112625  |
| 36 | 6 | 0 | 4.603869  | -1.828465 | -0.658702 |
| 37 | 1 | 0 | 4.157184  | 0.045845  | -1.636081 |
| 38 | 1 | 0 | 1.446694  | -1.123683 | 1.481122  |
| 39 | 1 | 0 | 2.781605  | -3.156351 | 1.890762  |
| 40 | 1 | 0 | 5.484157  | -2.030767 | -1.262768 |
| 41 | 1 | 0 | 4.794053  | -3.631155 | 0.513520  |
| 42 | 8 | 0 | 2.525978  | 1.725029  | -1.136789 |

-----

Conformers (1*S*,3*S*,5*R*)-**5a-02**:  $\Delta G = 2.49$  kcal/mol

SCF Done: E(RB3LYP) = -1073.85034767 A.U. after 7 cycles

Standard orientation:

| Center<br>Number | Atomic<br>Number | Atomic<br>Type | Coordinates (Angstroms) |          |           |
|------------------|------------------|----------------|-------------------------|----------|-----------|
|                  |                  |                | X                       | Y        | Z         |
| 1                | 6                | 0              | 0.687104                | 1.058981 | 0.259318  |
| 2                | 6                | 0              | -0.171823               | 2.236853 | -0.263013 |
| 3                | 6                | 0              | -0.331836               | 3.232383 | 0.911965  |
| 4                | 6                | 0              | -0.017325               | 2.394956 | 2.163343  |
| 5                | 6                | 0              | 1.102733                | 1.453457 | 1.688782  |

|    |   |   |           |           |           |
|----|---|---|-----------|-----------|-----------|
| 6  | 1 | 0 | 0.267911  | 2.706353  | -1.147495 |
| 7  | 1 | 0 | 0.398079  | 4.043345  | 0.806171  |
| 8  | 1 | 0 | -1.329065 | 3.682809  | 0.916358  |
| 9  | 1 | 0 | -0.895266 | 1.807458  | 2.458150  |
| 10 | 1 | 0 | 0.277682  | 3.002793  | 3.024616  |
| 11 | 1 | 0 | 1.249246  | 0.578807  | 2.327237  |
| 12 | 1 | 0 | 2.057469  | 1.994857  | 1.646370  |
| 13 | 8 | 0 | -0.209865 | -0.088515 | 0.329127  |
| 14 | 6 | 0 | -1.480582 | 1.569424  | -0.678090 |
| 15 | 6 | 0 | -1.246327 | 0.032674  | -0.640611 |
| 16 | 6 | 0 | -2.454066 | -0.769175 | -0.219052 |
| 17 | 6 | 0 | -4.759903 | -2.167362 | 0.537124  |
| 18 | 6 | 0 | -3.433886 | -1.079246 | -1.169612 |
| 19 | 6 | 0 | -2.639015 | -1.155610 | 1.112436  |
| 20 | 6 | 0 | -3.786308 | -1.855913 | 1.487007  |
| 21 | 6 | 0 | -4.580338 | -1.776362 | -0.791195 |
| 22 | 1 | 0 | -3.288348 | -0.778828 | -2.200835 |
| 23 | 1 | 0 | -1.878495 | -0.918697 | 1.848090  |
| 24 | 1 | 0 | -3.917116 | -2.159280 | 2.522464  |
| 25 | 1 | 0 | -5.334395 | -2.014894 | -1.536470 |
| 26 | 1 | 0 | -5.653785 | -2.711933 | 0.829881  |
| 27 | 8 | 0 | -0.839153 | -0.402321 | -1.922056 |
| 28 | 1 | 0 | -0.159885 | 0.204376  | -2.267462 |
| 29 | 8 | 0 | -2.509612 | 2.126517  | -0.973474 |
| 30 | 6 | 0 | 1.853640  | 0.672081  | -0.684921 |
| 31 | 6 | 0 | 2.848302  | -0.358948 | -0.267989 |
| 32 | 6 | 0 | 4.804547  | -2.246770 | 0.405823  |
| 33 | 6 | 0 | 4.100843  | -0.345734 | -0.906100 |
| 34 | 6 | 0 | 2.579589  | -1.342295 | 0.698879  |
| 35 | 6 | 0 | 3.554553  | -2.283346 | 1.026758  |
| 36 | 6 | 0 | 5.076387  | -1.275898 | -0.562800 |
| 37 | 1 | 0 | 4.288698  | 0.406445  | -1.665343 |
| 38 | 1 | 0 | 1.598017  | -1.398049 | 1.154012  |
| 39 | 1 | 0 | 3.334774  | -3.050736 | 1.763679  |
| 40 | 1 | 0 | 6.046395  | -1.249625 | -1.051455 |
| 41 | 1 | 0 | 5.564000  | -2.977763 | 0.670328  |

42            8            0            1.950675    1.222776    -1.776923

-----  
Conformers (1*S*,3*S*,5*R*)-**5a-03**:  $\Delta G = 2.72$  kcal/mol

SCF Done: E(RB3LYP) = -1073.84997351    A.U. after    7 cycles

Standard orientation:

-----

| Center<br>Number | Atomic<br>Number | Atomic<br>Type | Coordinates (Angstroms) |           |           |
|------------------|------------------|----------------|-------------------------|-----------|-----------|
|                  |                  |                | X                       | Y         | Z         |
| 1                | 6                | 0              | -0.586733               | 0.336603  | -0.439732 |
| 2                | 6                | 0              | -0.359633               | 1.102590  | 0.900818  |
| 3                | 6                | 0              | -0.455354               | 2.612301  | 0.563620  |
| 4                | 6                | 0              | -0.212656               | 2.684903  | -0.954475 |
| 5                | 6                | 0              | -0.901978               | 1.419077  | -1.497434 |
| 6                | 1                | 0              | -1.035965               | 0.811056  | 1.709886  |
| 7                | 1                | 0              | -1.454836               | 2.992431  | 0.807831  |
| 8                | 1                | 0              | 0.262535                | 3.188115  | 1.155935  |
| 9                | 1                | 0              | 0.861687                | 2.644821  | -1.167561 |
| 10               | 1                | 0              | -0.603631               | 3.602895  | -1.404586 |
| 11               | 1                | 0              | -0.534270               | 1.098727  | -2.476741 |
| 12               | 1                | 0              | -1.981256               | 1.576501  | -1.581718 |
| 13               | 8                | 0              | 0.709730                | -0.198628 | -0.794093 |
| 14               | 6                | 0              | 1.065237                | 0.696182  | 1.308202  |
| 15               | 6                | 0              | 1.493640                | -0.444840 | 0.354155  |
| 16               | 6                | 0              | 2.962084                | -0.466016 | -0.007175 |
| 17               | 6                | 0              | 5.706025                | -0.456924 | -0.568693 |
| 18               | 6                | 0              | 3.856423                | -1.134341 | 0.836391  |
| 19               | 6                | 0              | 3.449410                | 0.209955  | -1.131137 |
| 20               | 6                | 0              | 4.816182                | 0.209819  | -1.412299 |
| 21               | 6                | 0              | 5.222321                | -1.128209 | 0.556102  |
| 22               | 1                | 0              | 3.471674                | -1.664222 | 1.700807  |
| 23               | 1                | 0              | 2.755950                | 0.717253  | -1.793336 |
| 24               | 1                | 0              | 5.184647                | 0.728330  | -2.293718 |
| 25               | 1                | 0              | 5.909429                | -1.651268 | 1.216010  |
| 26               | 1                | 0              | 6.770634                | -0.455537 | -0.787809 |
| 27               | 8                | 0              | 1.073335                | -1.621649 | 1.025536  |

-----

|    |   |   |           |           |           |
|----|---|---|-----------|-----------|-----------|
| 28 | 1 | 0 | 0.552566  | -2.124124 | 0.366043  |
| 29 | 8 | 0 | 1.713839  | 1.195287  | 2.193078  |
| 30 | 6 | 0 | -1.599874 | -0.835380 | -0.390544 |
| 31 | 6 | 0 | -3.067461 | -0.599041 | -0.186877 |
| 32 | 6 | 0 | -5.839867 | -0.359266 | 0.200943  |
| 33 | 6 | 0 | -3.925435 | -1.683613 | -0.443179 |
| 34 | 6 | 0 | -3.623553 | 0.605558  | 0.274805  |
| 35 | 6 | 0 | -4.999296 | 0.721047  | 0.472016  |
| 36 | 6 | 0 | -5.298603 | -1.563101 | -0.258987 |
| 37 | 1 | 0 | -3.487936 | -2.614686 | -0.786429 |
| 38 | 1 | 0 | -2.992999 | 1.457797  | 0.496964  |
| 39 | 1 | 0 | -5.413081 | 1.656358  | 0.838187  |
| 40 | 1 | 0 | -5.948485 | -2.407828 | -0.469531 |
| 41 | 1 | 0 | -6.912097 | -0.264861 | 0.349723  |
| 42 | 8 | 0 | -1.198134 | -1.981957 | -0.541905 |

---

## References

- 1) Brown, T. J.; Cumbes, M.; Diorazio, L. J.; Clarkson, G. J.; Wills, M., *J. Org. Chem.* **2017**, *82*, 10489-10503.
- 2) Amatore, M.; Leblond, A.; Malacria, M.; Gandon, V.; Aubert, C., *J. Am. Chem. Soc.* **2013**, *135*, 4576-4579.
- 3) (a) Xie, C.-L.; Chen, R.; Yang, S.; Xia, J.-M.; Zhang, G.-Y.; Chen, C.-H.; Zhang, Y.; Yang, X.-W. *Org. Lett.* **2019**, *21*, 8174-8177; (b) Kawamoto, Y.; Kitsukawa, H.; Kobayashi, T.; Ito, H. *Org. Lett.* **2021**, *23*, 7074-7078; (c) Leblond, A.; Houari, I.; Beauxis, Y.; Leblanc, K.; Poupon, E.; Beniddir, M. A. *Org. Lett.* **2022**, *24*, 1247-1252.
- 4) Spartan'18, Wavefunction Inc., Irvine, CA. Many people have contributed to Spartan's interface. The current members are: Bernard Deppmeier, Andy Driessen, Thomas Hehre, Warren Hehre, Philip Klunzinger, Sean Ohlinger, and Jurgen Schnitker. Except for molecular mechanics and semi-empirical models, the calculation methods used in Spartan have been documented in: Y. Shao, L. F. Molnar, Y. Jung, J. Kussmann, C. Ochsenfeld, S. T. Brown, A. T. B. Gilbert, L. V. Slipchenko, S. V. Levchenko, D. P. O'Neill, R. A. DiStasio Jr., R. C. Lochan, T. Wang, G. J. O. Beran, N. A. Besley, J. M. Herbert, C. Y. Lin, T. Van Voorhis, S. H. Chien, A. Sodt, R. P. Steele, V. A. Rassolov, P. E. Maslen, P. P. Korambath, R. D. Adamson, B. Austin, J. Baker, E. F. C. Byrd, H. Dachsel, R. J. Doerksen, A. Dreuw, B. D. Dunietz, A. D. Dutoi, T. R. Furlani, S. R. Gwaltney, A. Heyden, S. Hirata, C.-P. Hsu, G. Kedziora, R. Z. Khalliumlin, P. Klunzinger, A. M. Lee, M. S. Lee, W. Z. Liang, I. Lotan, N. Nair, B. Peters, E. I. Proynov, P. A. Pieniazek, Y. M. Rhee, J. Ritchie, E. Rosta, C. D. Sherrill, A. C. Simmonett, J. E. Subotnik, H. L. Woodcock III, W. Zhang, A. T. Bell, A. K. Chakraborty, D. M. Chipman, F. J. Keil, A. Warshel, W. J. Hehre, H. F. Schaefer, J. Kong, A. I. Krylov, P. M. W. Gill, and M. Head-Gordon, *Phys. Chem. Chem. Phys.*, *8*, 3172 (2006).
- 5) Gaussian 09, Revision A.02, M. J. Frisch, G. W. Trucks, H. B. Schlegel, G. E. Scuseria, M. A. Robb, J. R. Cheeseman, G. Scalmani, V. Barone, B. Mennucci, G. A. Petersson, H. Nakatsuji, M. Caricato, X. Li, H. P. Hratchian, A. F. Izmaylov, J. Bloino, G. Zheng, J. L. Sonnenberg, M. Hada, M. Ehara, K. Toyota, R. Fukuda, J. Hasegawa, M. Ishida, T. Nakajima, Y. Honda, O. Kitao, H. Nakai, T. Vreven, J. A. Montgomery, Jr., J. E. Peralta, F. Ogliaro, M. Bearpark, J. J. Heyd, E. Brothers, K. N. Kudin, V. N. Staroverov, R. Kobayashi, J. Normand, K. Raghavachari, A. Rendell, J. C. Burant, S. S. Iyengar, J. Tomasi, M. Cossi, N. Rega, J. M. Millam, M. Klene, J. E. Knox, J. B. Cross, V. Bakken, C. Adamo, J. Jaramillo, R. Gomperts, R. E. Stratmann, O. Yazyev, A. J. Austin, R. Cammi, C. Pomelli, J. W. Ochterski, R. L. Martin, K. Morokuma, V. G. Zakrzewski, G. A. Voth, P. Salvador, J. J. Dannenberg, S. Dapprich, A. D. Daniels, O. Farkas, J. B. Foresman, J. V. Ortiz, J. Cioslowski, and D. J. Fox, Gaussian, Inc., Wallingford CT, 2009.
- 6) Halgren, T. A. *J. Comput. Chem.* **1996**, *17*, 490-519.
- 7) Becke, A. D. *J. Chem. Phys.* **1993**, *98*, 5648-5652.



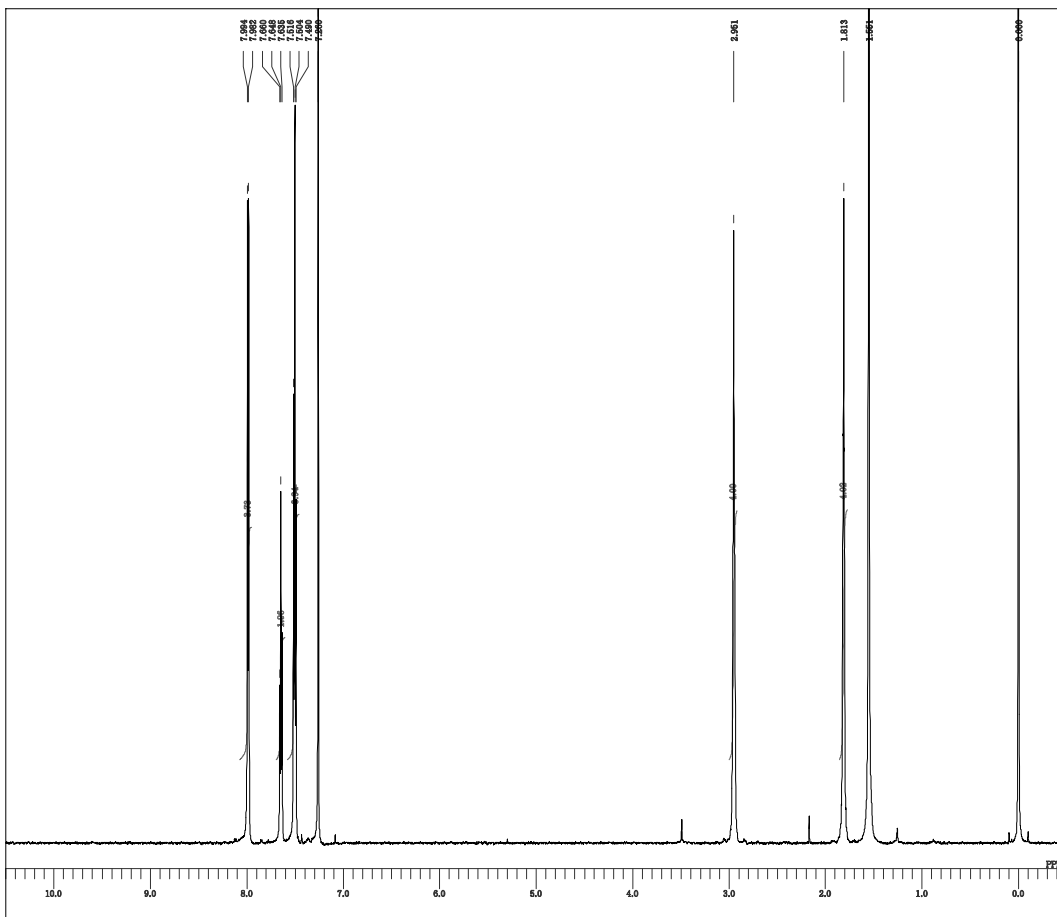

DP1.E TD81.Lm.Ph.1H-1.Lab  
 COMPT 2021-09-17 11:11:30  
 DATM 1H  
 EXMCD sdsds.phsa.es2  
 EXMNUC 600.17 MHz  
 EXMPC 5.30 Hz  
 EXMPT 5.47 Hz  
 EXMPP 26214  
 EXMPS 900.67 Hz  
 EXMPT 8  
 EXMPC 2.0000 sec  
 EXMPT 2.0000 sec  
 EXMPC 5.90 usec  
 EXMNUC 1H  
 EXMPC 26.1 °C  
 EXMPC 0.00 ppm  
 EXMPC 1.40 Hz  
 EXMPC 95  
 EXMPC 95

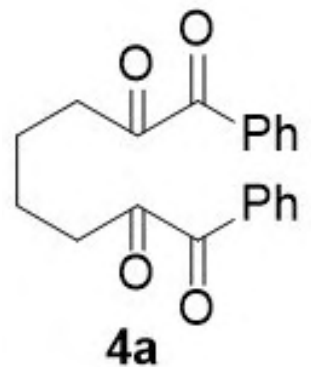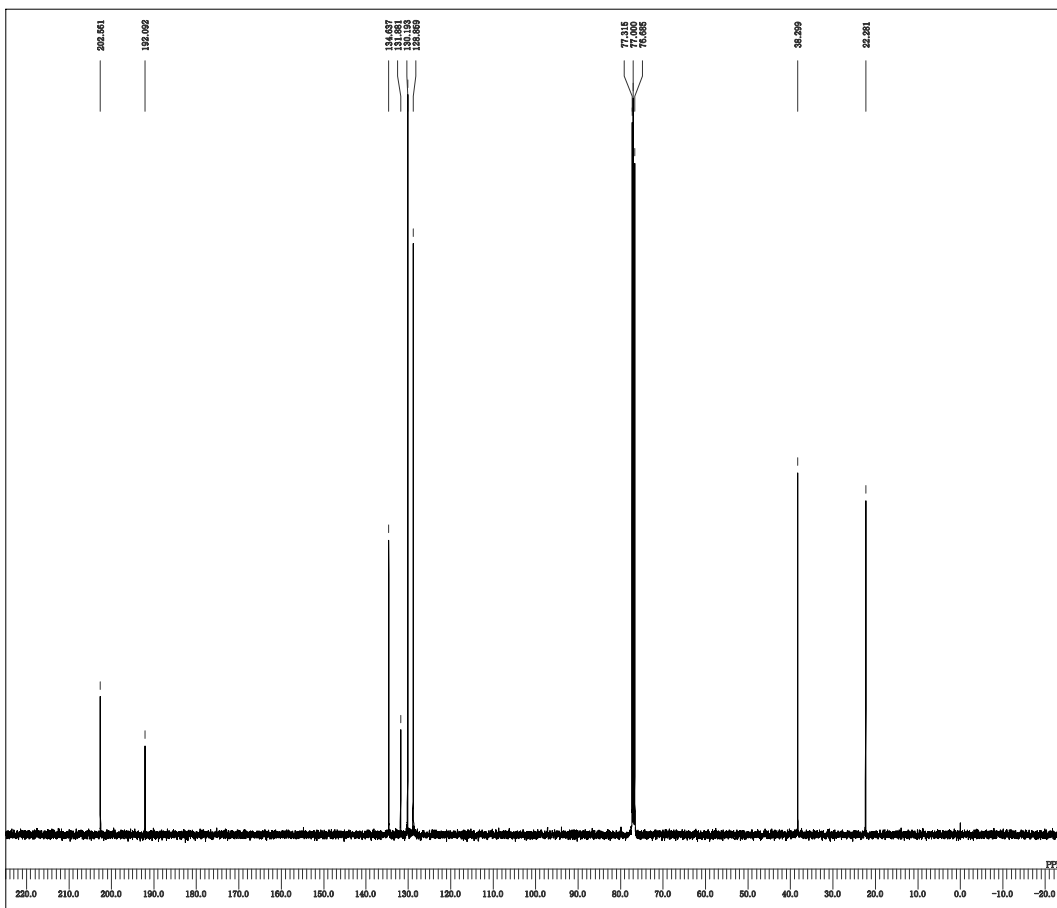

DP1.E TD81.Lm.13C-1.Lab  
 COMPT 2021-09-17 14:29:10  
 DATM 13C  
 EXMCD sdsds.phsa.dec  
 EXMNUC 100.63 MHz  
 EXMPC 5.35 Hz  
 EXMPT 5.86 Hz  
 EXMPP 26214  
 EXMPS 26126.54 Hz  
 EXMPT 1000  
 EXMPC 1.0403 sec  
 EXMPT 1.2000 sec  
 EXMPC 2.99 usec  
 EXMNUC 1H  
 EXMPC 25.4 °C  
 EXMPC 0.00 ppm  
 EXMPC 1.40 Hz  
 EXMPC 60

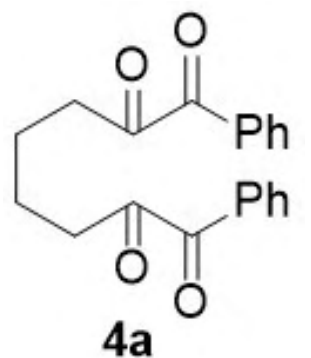

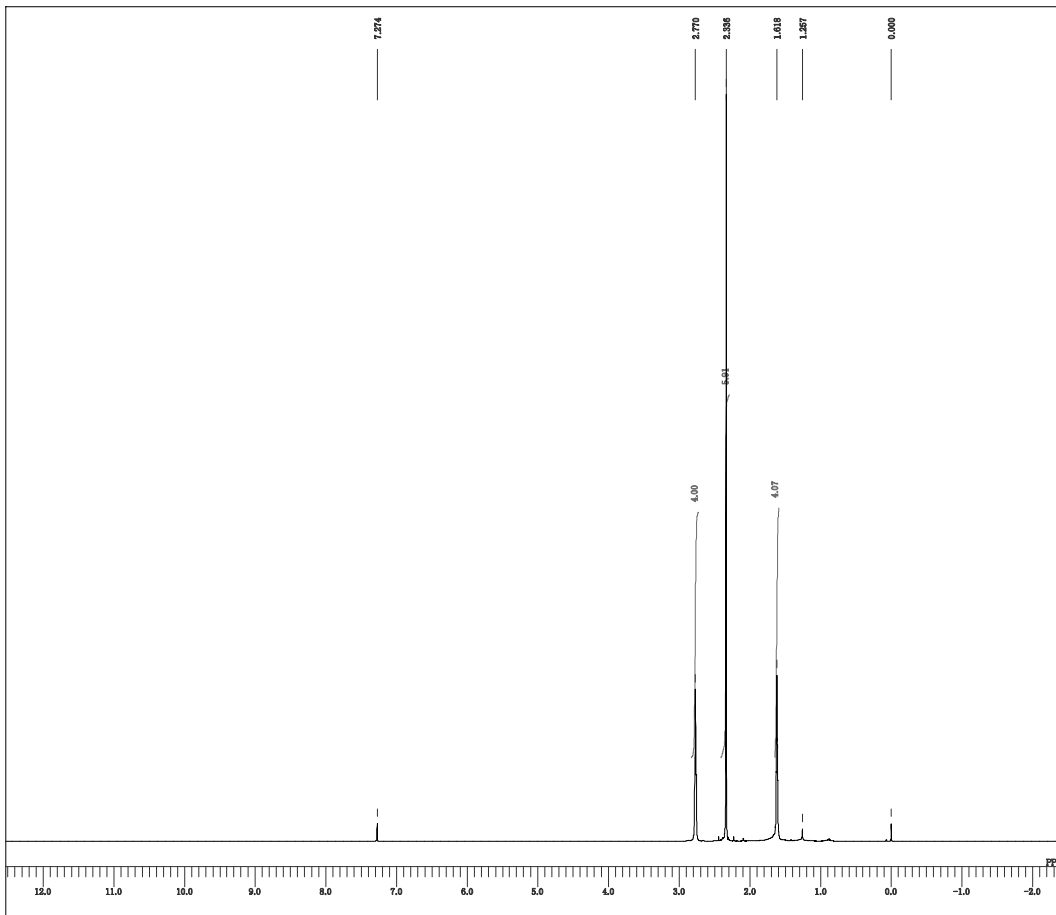

DP1L5 MK52\_um\_Ma\_1H-1 Lab  
 COMPT 2021-09-17 15:14:34  
 DATM 1H  
 OBNUC meade.pelna.ac2  
 EXMCD 600.17 MHz  
 OBFRQ 600.17 MHz  
 OBSET 5.30 Hz  
 OBPRN 5.47 Hz  
 POINT 26214  
 PBEQU 909.67 Hz  
 SCANS 8  
 ACQTM 2.0000 sec  
 PD 2.0000 sec  
 PVI 5.90 usec  
 IRNUC 1H  
 CTBAP 26.0 °C  
 SLVNT CDCl3  
 EXREF 0.00 ppm  
 RF 1.40 Hz  
 RGAIN 40

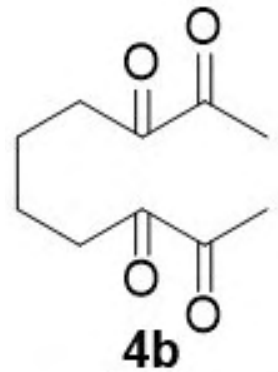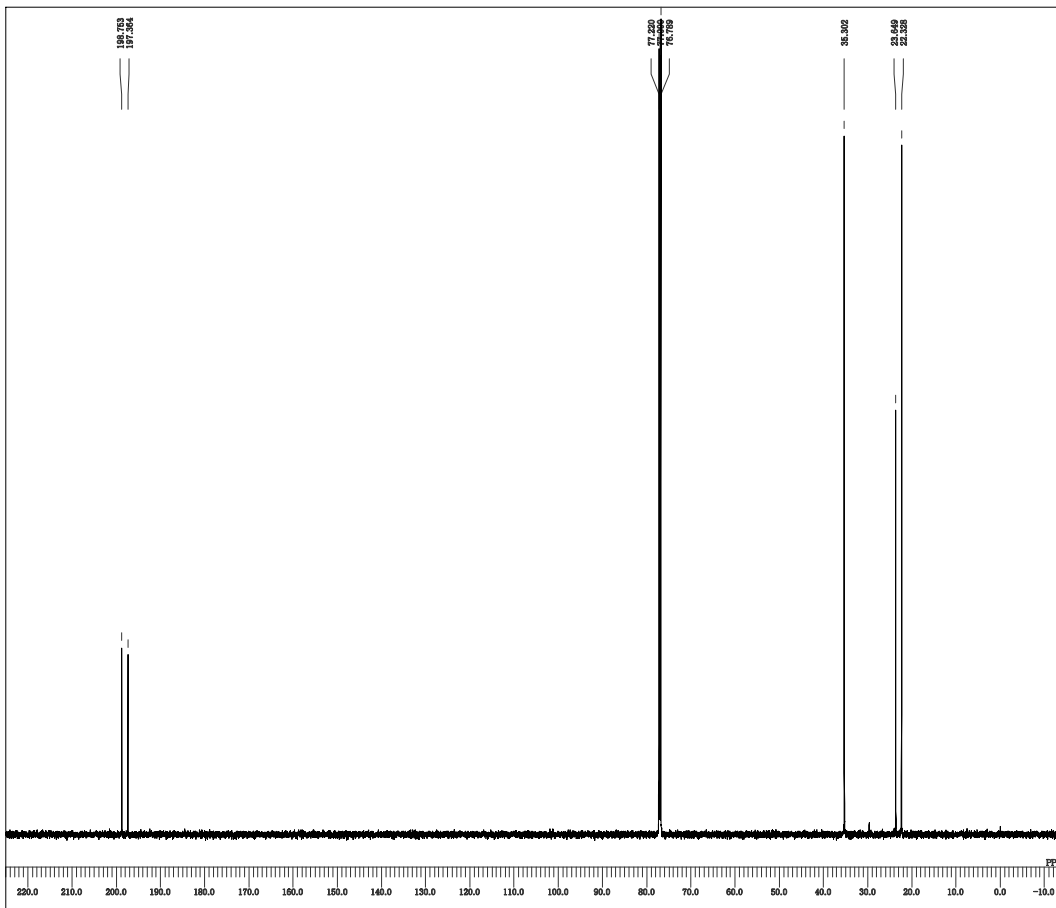

DP1L5 MK52\_um\_Ma\_13C-1 Lab  
 COMPT 2021-09-17 15:13:14  
 DATM 13C  
 OBNUC meade.pelna.dec  
 EXMCD 150.92 MHz  
 OBFRQ 150.92 MHz  
 OBSET 1.74 Hz  
 OBPRN 1.74 Hz  
 POINT 26214  
 PBEQU 37876.21 Hz  
 SCANS 1000  
 ACQTM 0.0921 sec  
 PD 1.2000 sec  
 PVI 3.50 usec  
 IRNUC 1H  
 CTBAP 25.3 °C  
 SLVNT CDCl3  
 EXREF 77.00 ppm  
 RF 1.40 Hz  
 RGAIN 66

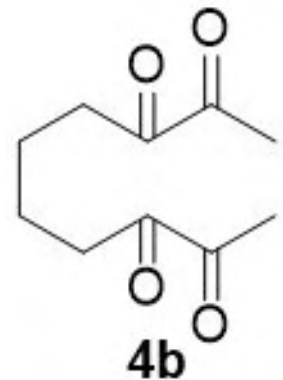

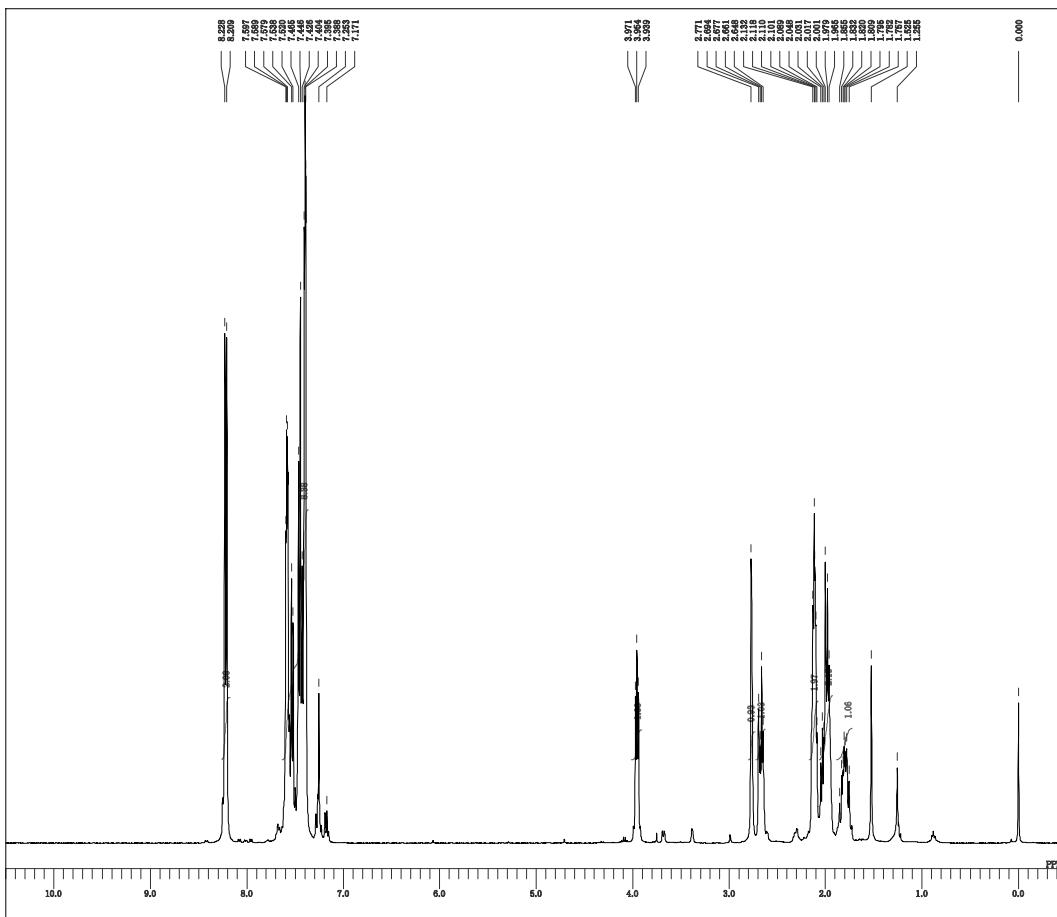

DP1L5 MK 78-78A-1.ala  
 COM1T 2020-12-03 09:22:07  
 DAT1M 1H  
 OBNUC 500.136362  
 EPMCD 399.78 MHz  
 OBF1Q 4.19 Hz  
 OBF2Q 1.29 Hz  
 POINT 13107  
 PREQJ 6002.31 Hz  
 SCANS 8  
 ACQTM 2.1837 sec  
 PD 2.0000 sec  
 PVI 5.00 usec  
 IRNUC 1H  
 CTMP 21.1 °C  
 SLVNT CDCl3  
 EXRSP 0.00 ppm  
 RF 1.40 Hz  
 RGAIN 36

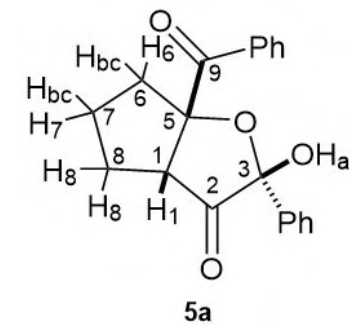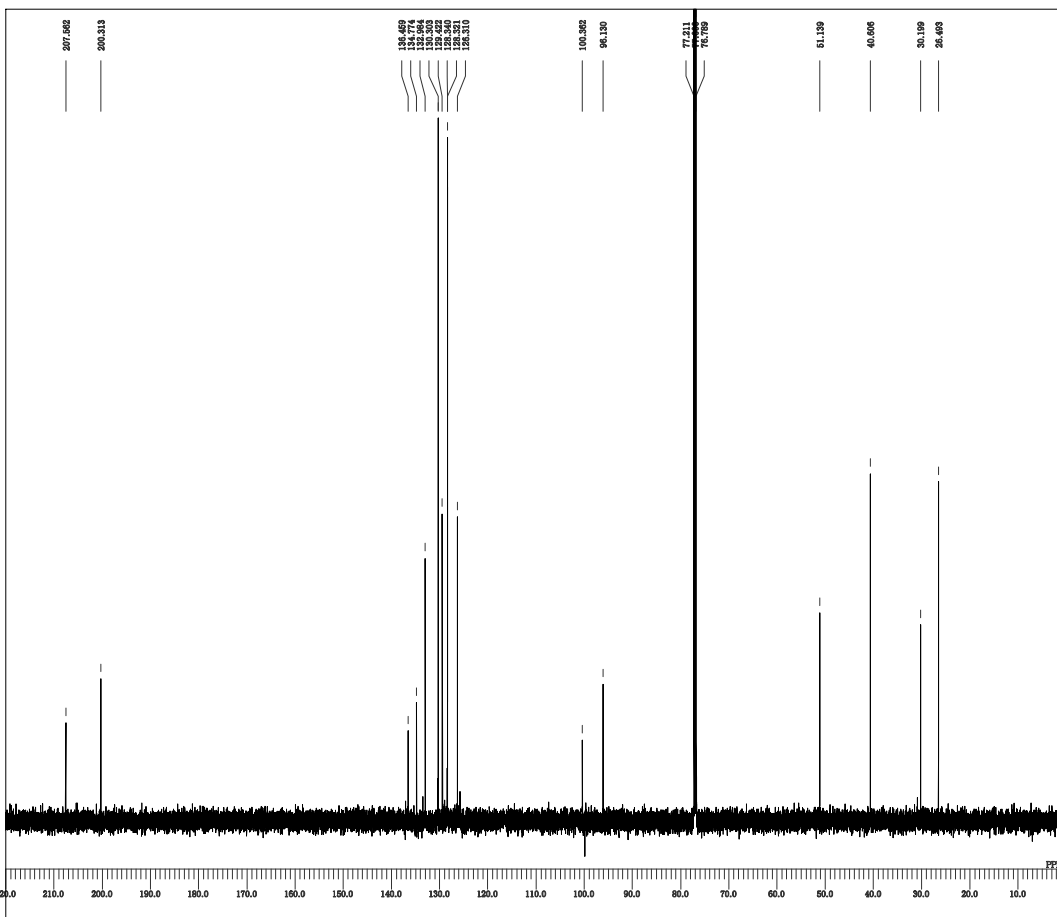

DP1L5 MK 45-A,9-10aha\_36aha\_13c-1.ala  
 COM1T 2020-07-03 10:22:03  
 DAT1M 13C  
 OBNUC 150.92 MHz  
 EPMCD 3.59 Hz  
 OBF1Q 1.74 Hz  
 OBF2Q 26214  
 POINT 37878.21 Hz  
 SCANS 161  
 ACQTM 0.6923 sec  
 PD 1.2000 sec  
 PVI 3.57 usec  
 IRNUC 1H  
 CTMP 21.1 °C  
 SLVNT CDCl3  
 EXRSP 77.00 ppm  
 RF 0.12 Hz  
 RGAIN 66

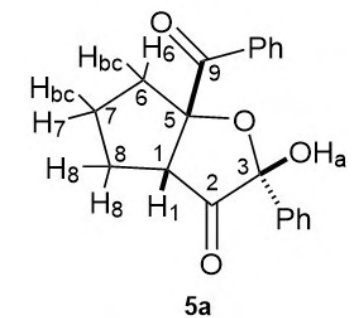

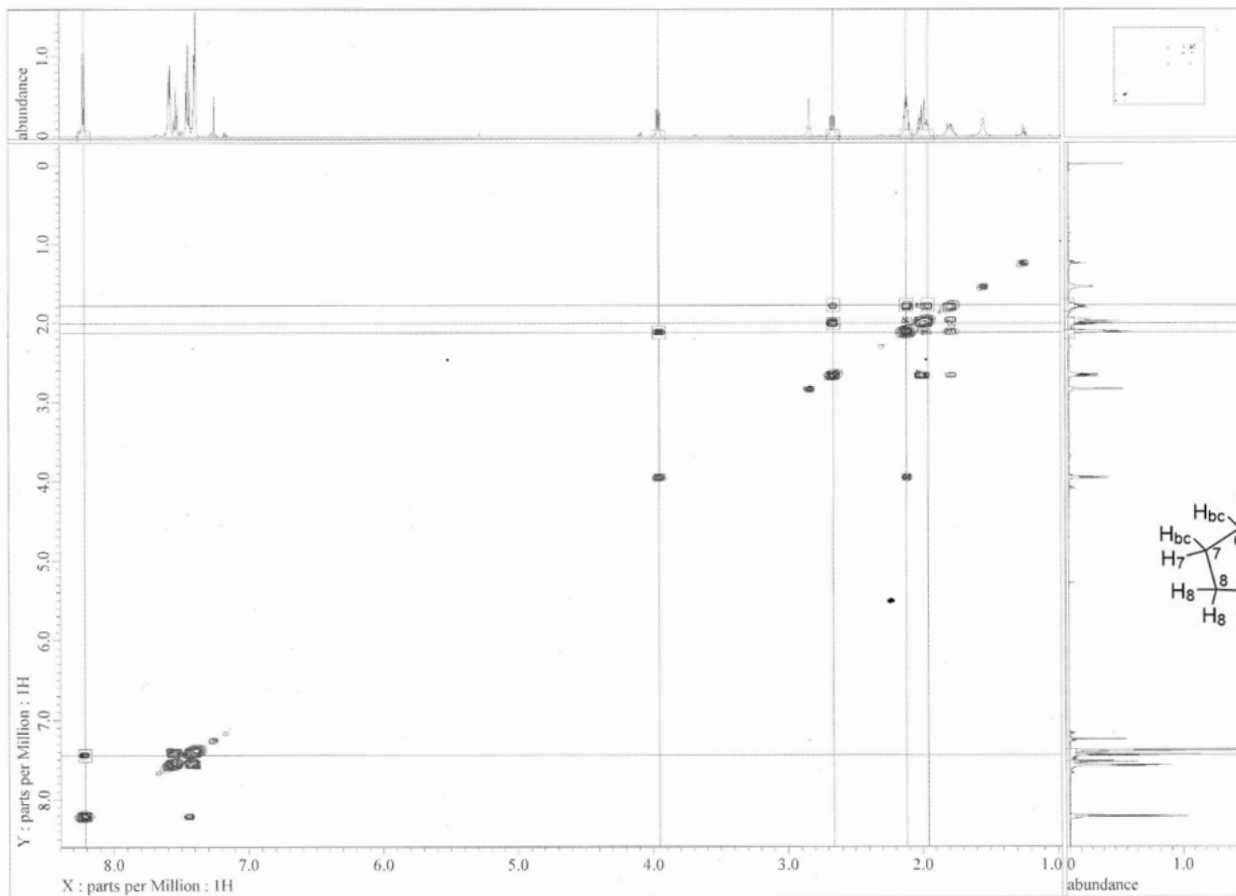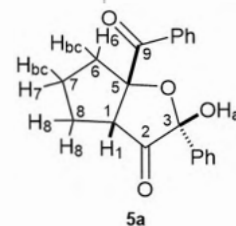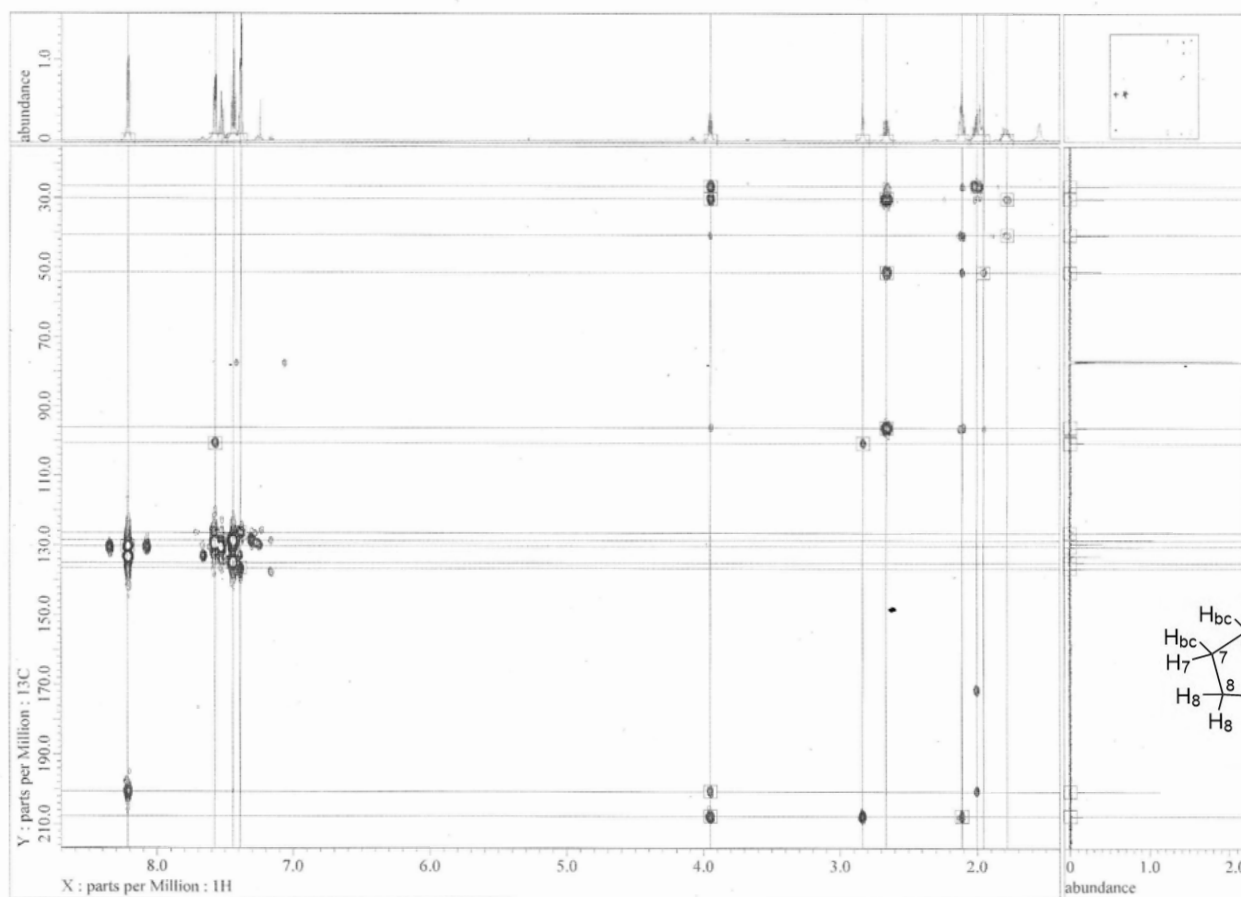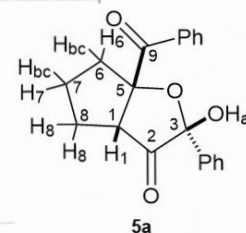

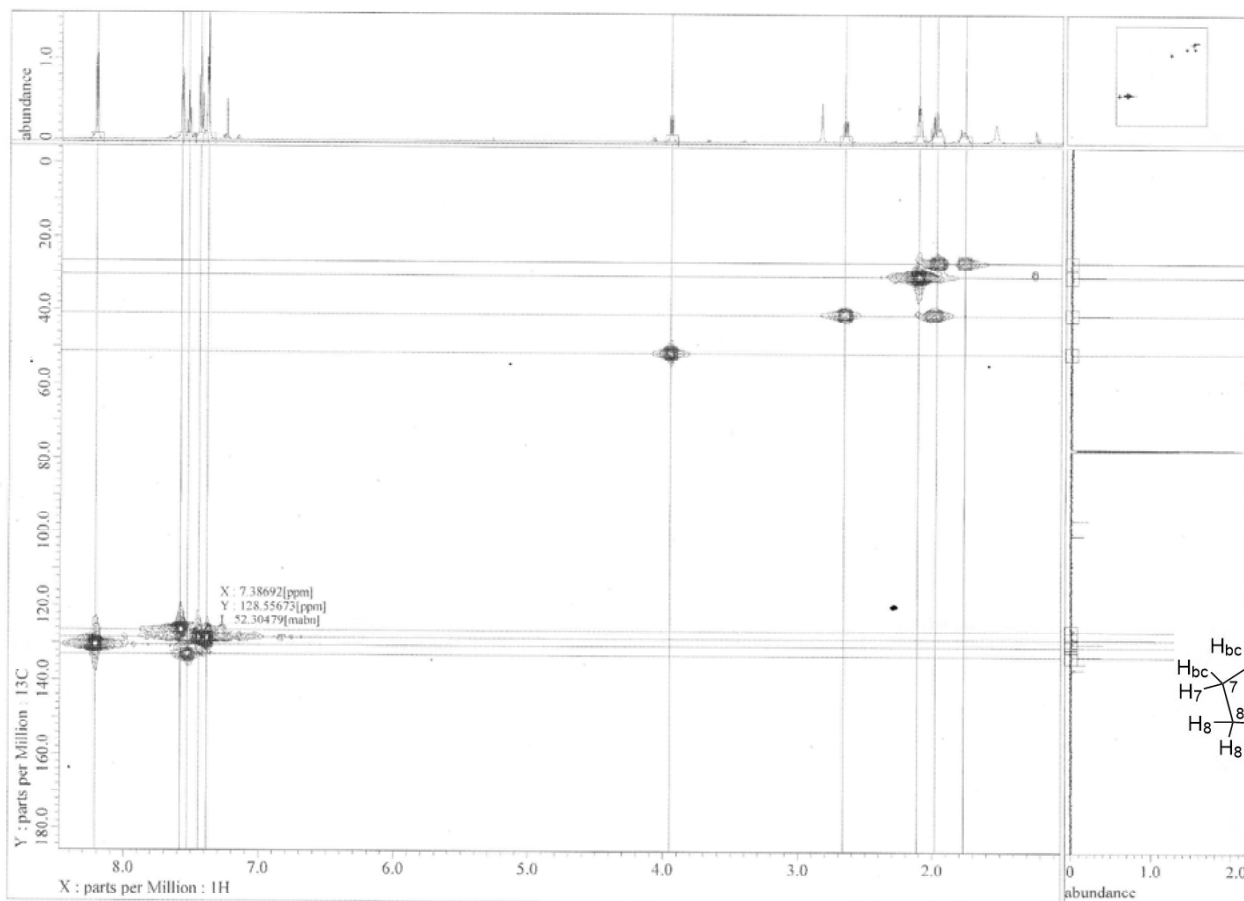

HMQC

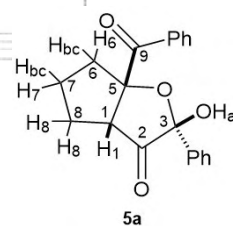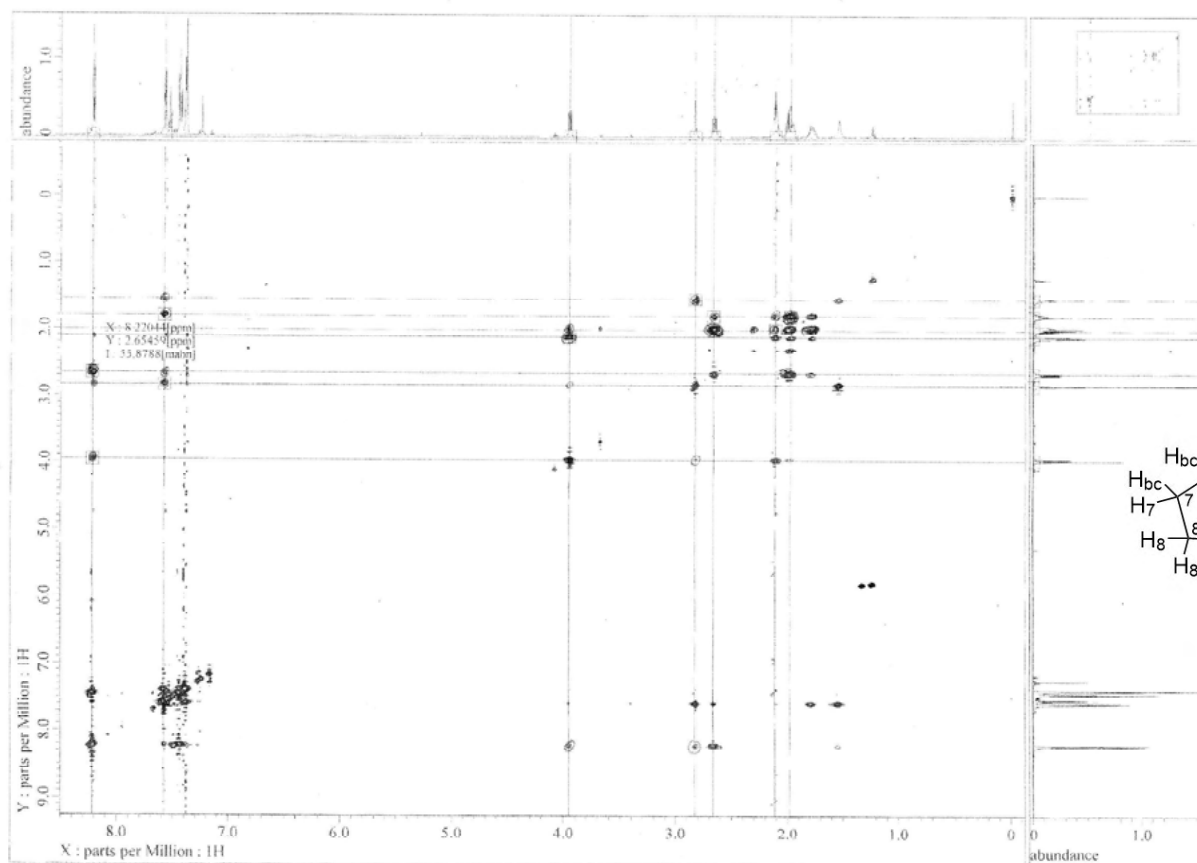

NOESY

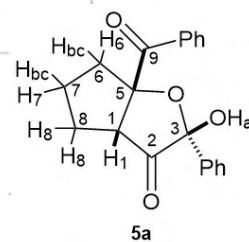



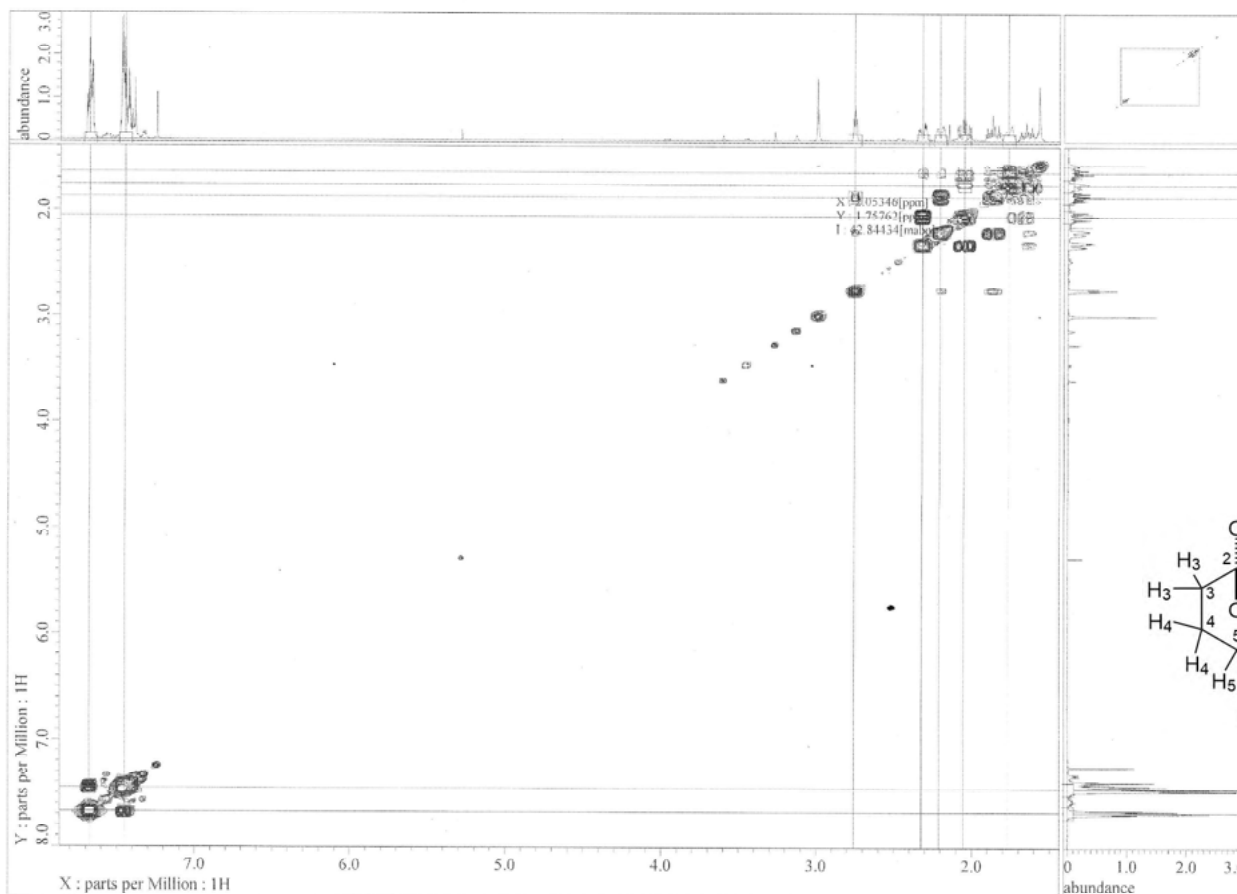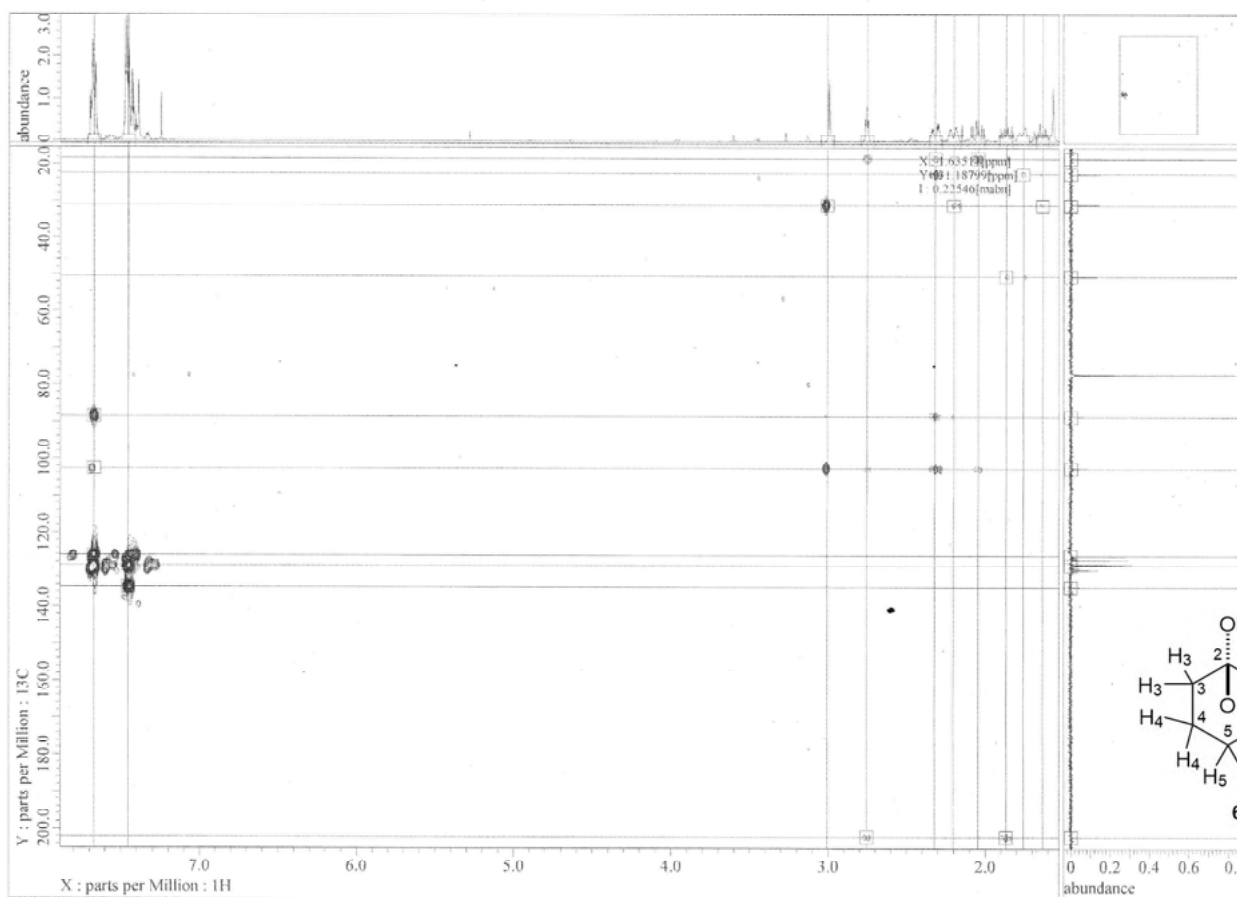





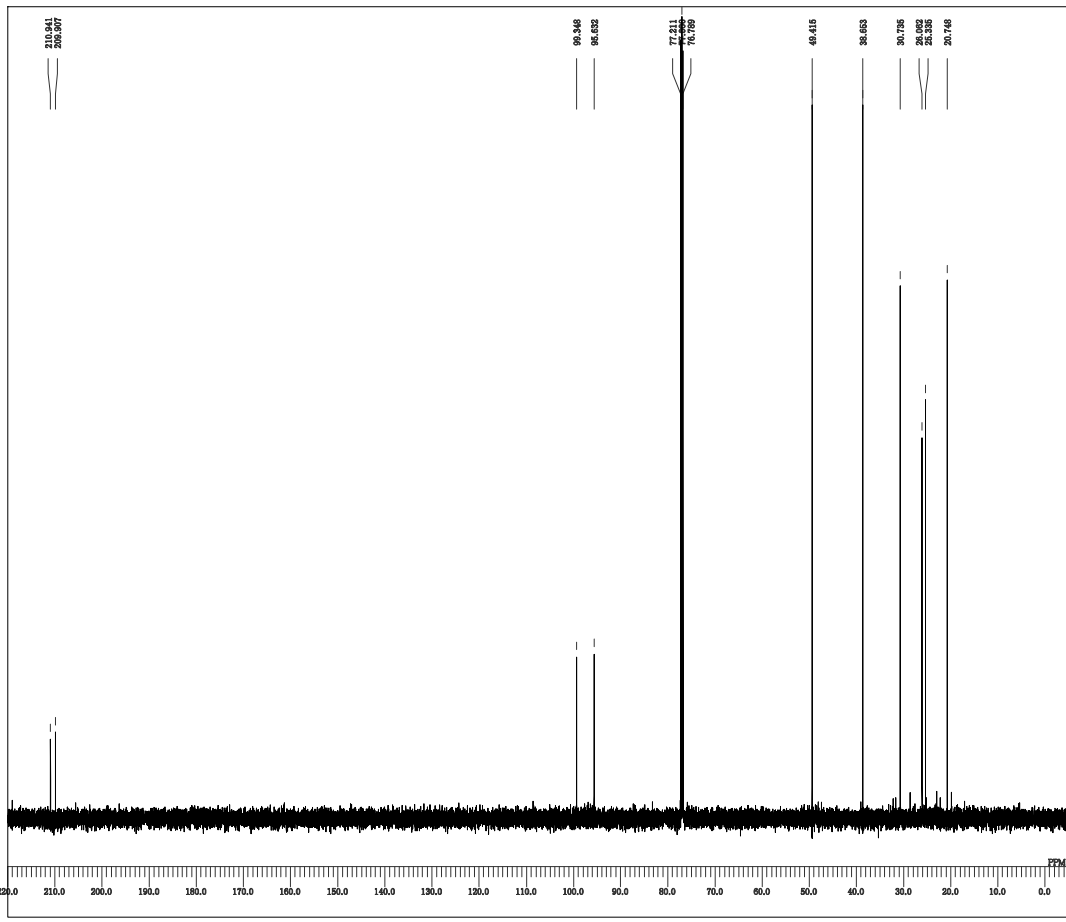

DFILE MK\_35\_13C-1.sls  
 COMPT 2020-09-11 10:44:47  
 DATM 13C  
 EXMCD 150.92 MHz  
 OBSFRQ 150.92 MHz  
 OBSRT 3.82 Hz  
 OBSFL 3.74 Hz  
 POINT 2821  
 FREQJ 375.51 Hz  
 SCANS 115  
 ACQTM 0.692 sec  
 PD 1.200 sec  
 PULP 3.67 usec  
 INUC 1H  
 CTMP 22.9 °  
 SOLV CDCl3  
 EXRF 77.00 ppm  
 RF 6.20 Hz  
 RGAIN 88

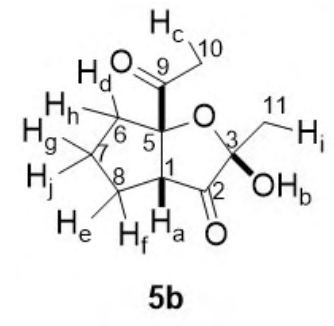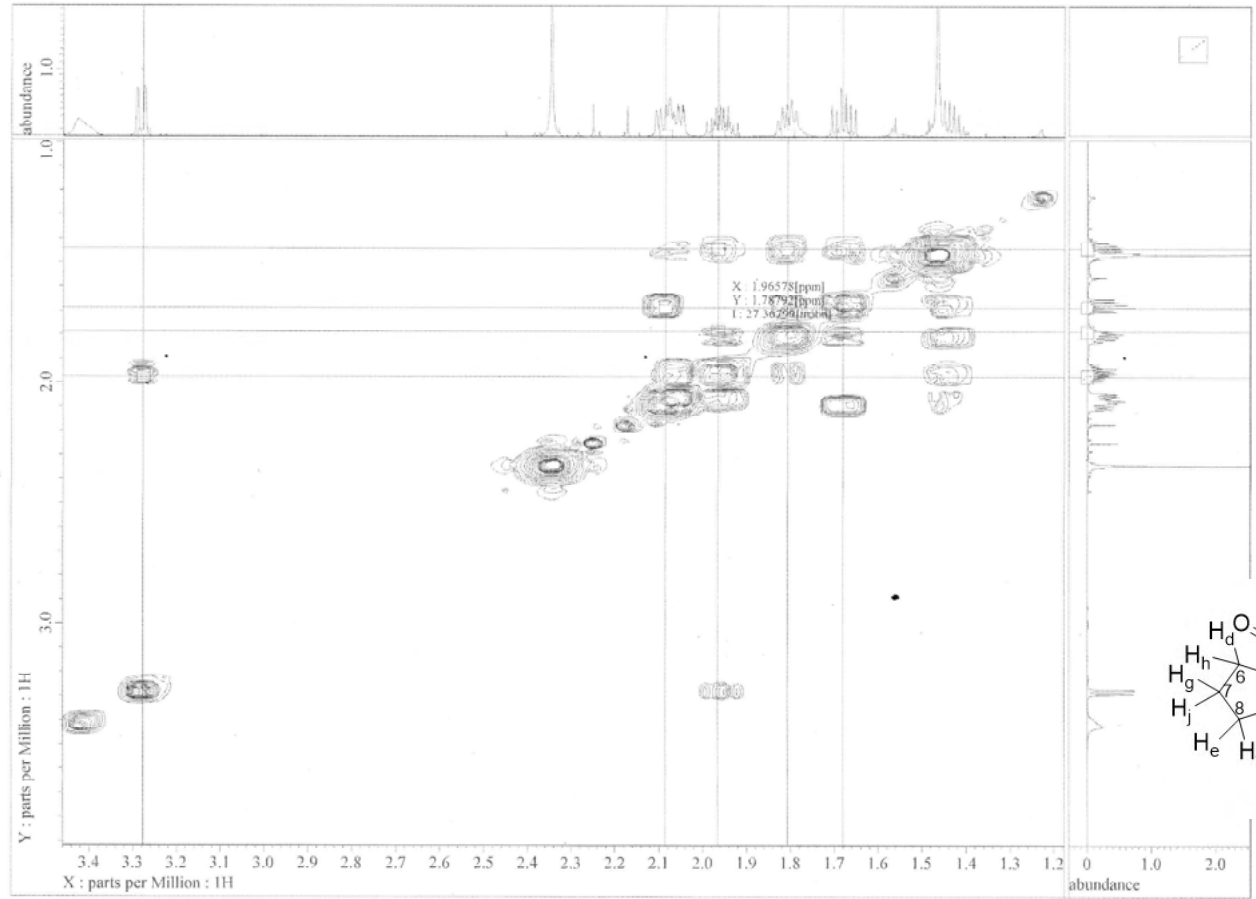

H-H COSY

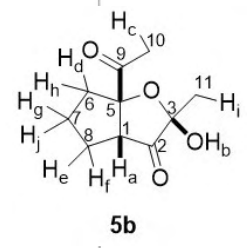



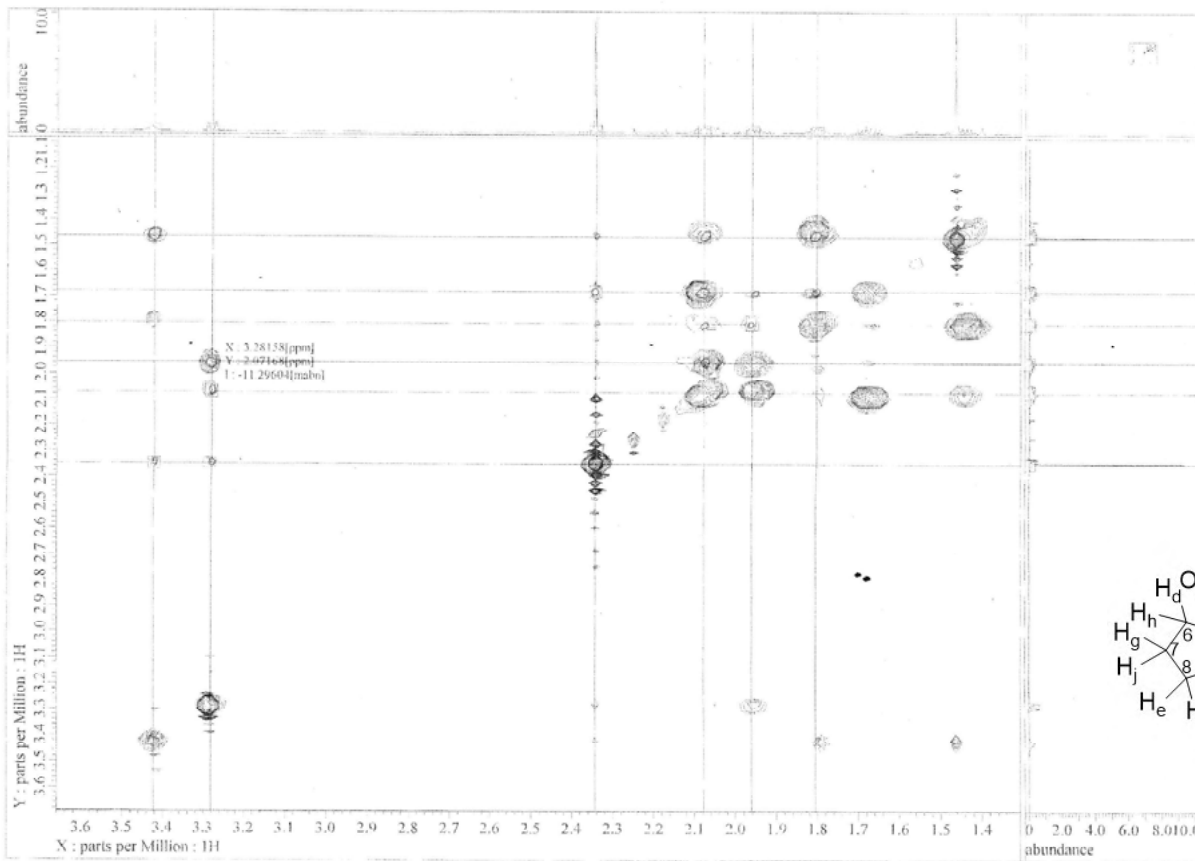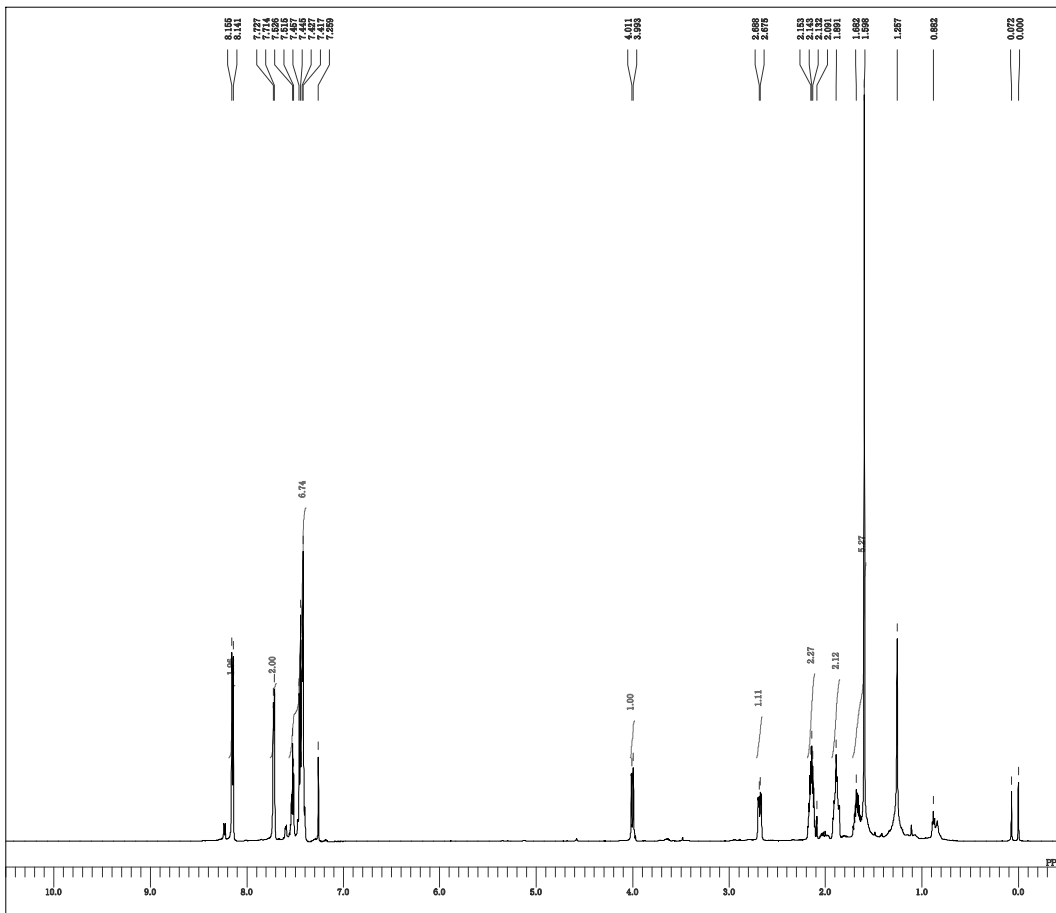

DP1.5 TD82.55ac\_1H-1.sis  
COMPT 2021-09-06 16:28:03  
DATM 1H  
OBNUC 4  
EMUCD 4  
OBPROQ 600.17 MHz  
OBSPCT 5.30 Hz  
OBSPRN 5.47 Hz  
PQNT 26214  
PSEQUJ 9008.87 Hz  
SCANS 8  
ACQTM 2.3098 sec  
PD 2.0000 sec  
ACQTM 5.90 msec  
PWI 1  
IRNLJC 1H  
CYBAP 34.3 c  
SLVNT CDCl3  
EXREF 0.00 ppm  
RF 140 Hz  
RGAIN 44

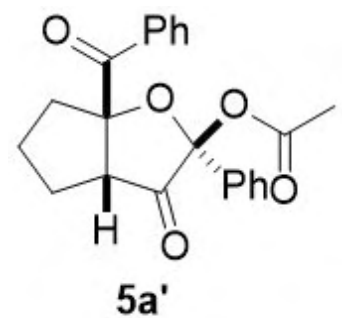

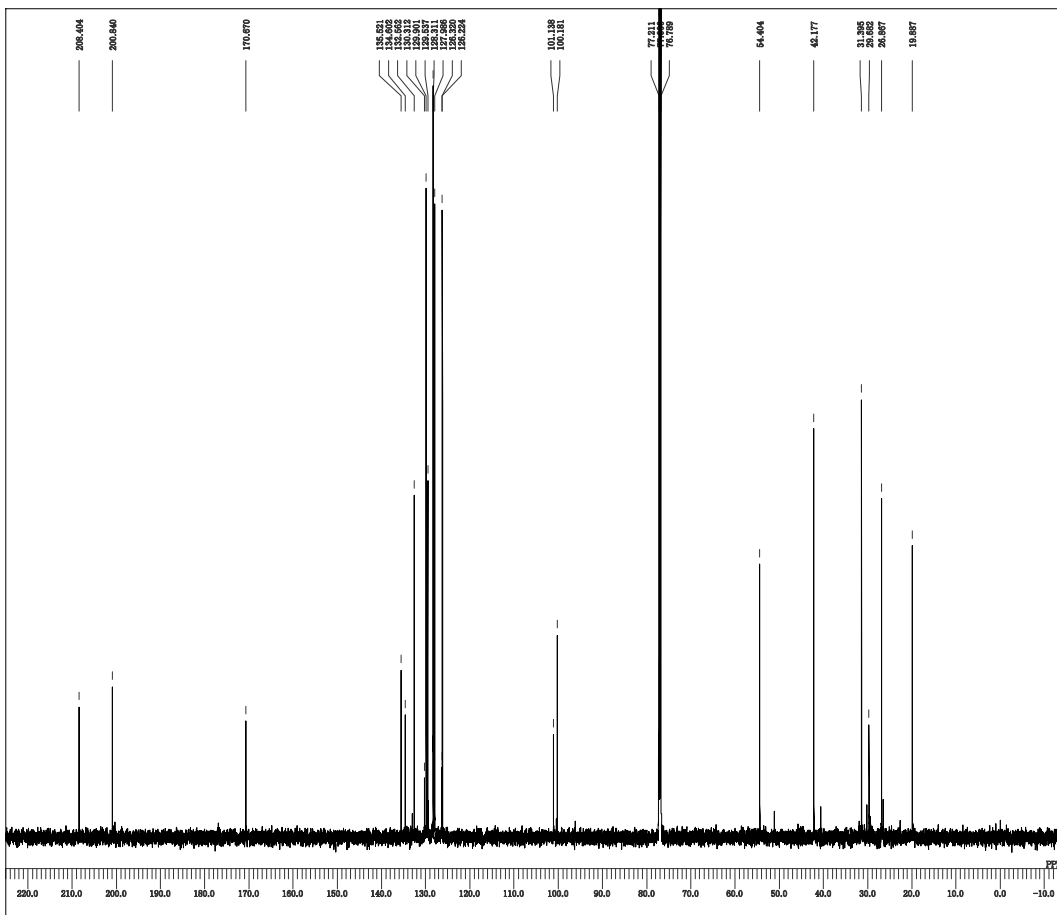

DP1L TD82.65ac\_13C-1.ah  
 COMMT  
 DATM 2021-09-06 15:26:44  
 OBNUC 13C  
 EXMCD  
 OBFRQ 150.92 MHz  
 OBSET 5.82 Hz  
 OBPRN 3.74 Hz  
 POINT 3871  
 PSEQJ 37379.51 Hz  
 SCANS 1000  
 ACQTM 0.8921 sec  
 PD 1.2000 sec  
 PVI 3.60 usec  
 INULC 1H  
 CTBAP 24.6 c  
 SLVNT CDCl3  
 EXRBP 77.00 ppm  
 RF 1.40 Hz  
 RGAIN 96

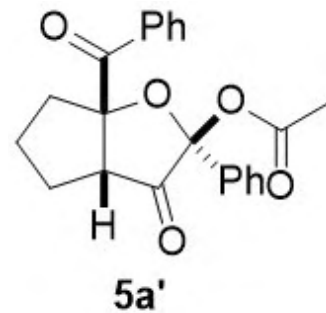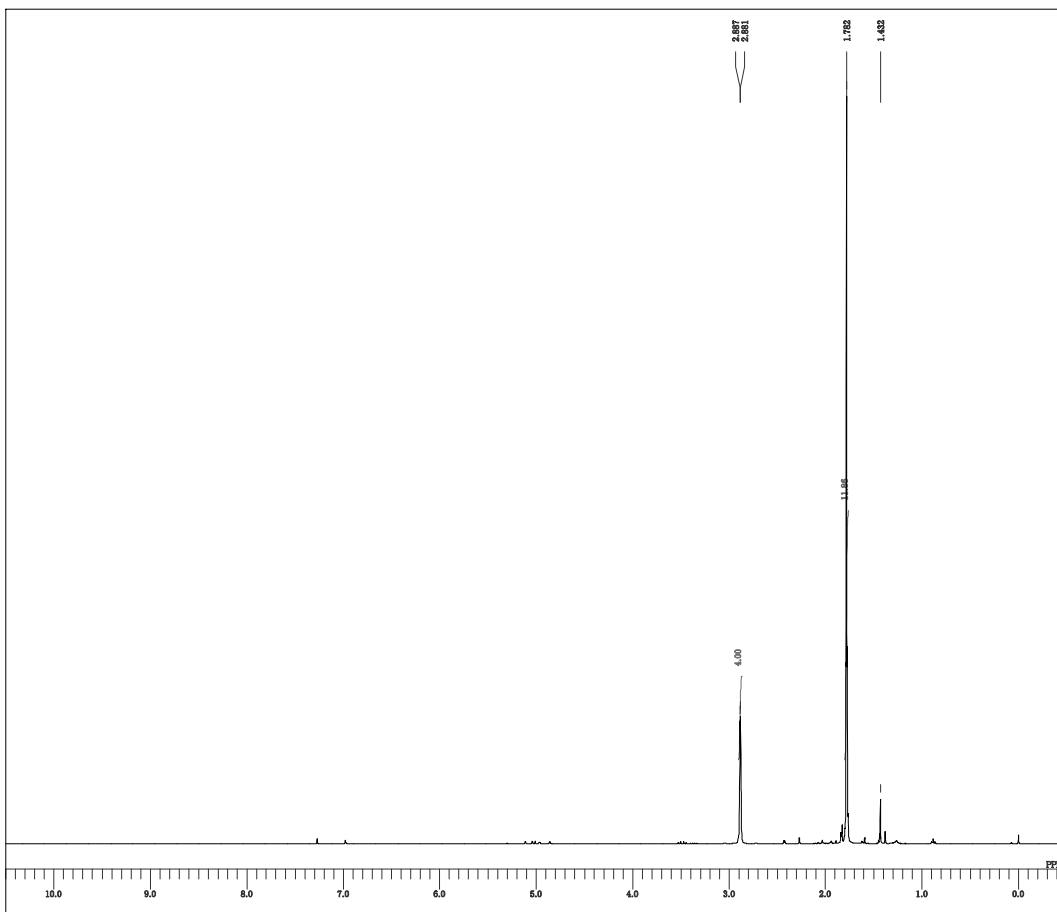

DP1L TD139.9-4-9-1.ah  
 COMMT  
 DATM 2022-01-13 15:33:42  
 OBNUC 1H  
 EXMCD  
 OBFRQ 399.78 MHz  
 OBSET 4.19 Hz  
 OBPRN 7.29 Hz  
 POINT 15107  
 PSEQJ 6092.51 Hz  
 SCANS 8  
 ACQTM 2.1837 sec  
 PD 2.0000 sec  
 PVI 5.00 usec  
 INULC 1H  
 CTBAP 39.4 c  
 SLVNT CDCl3  
 EXRBP 0.00 ppm  
 RF 0.20 Hz  
 RGAIN 28

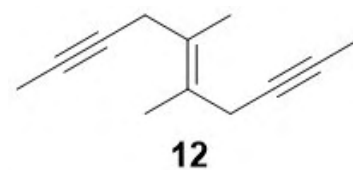

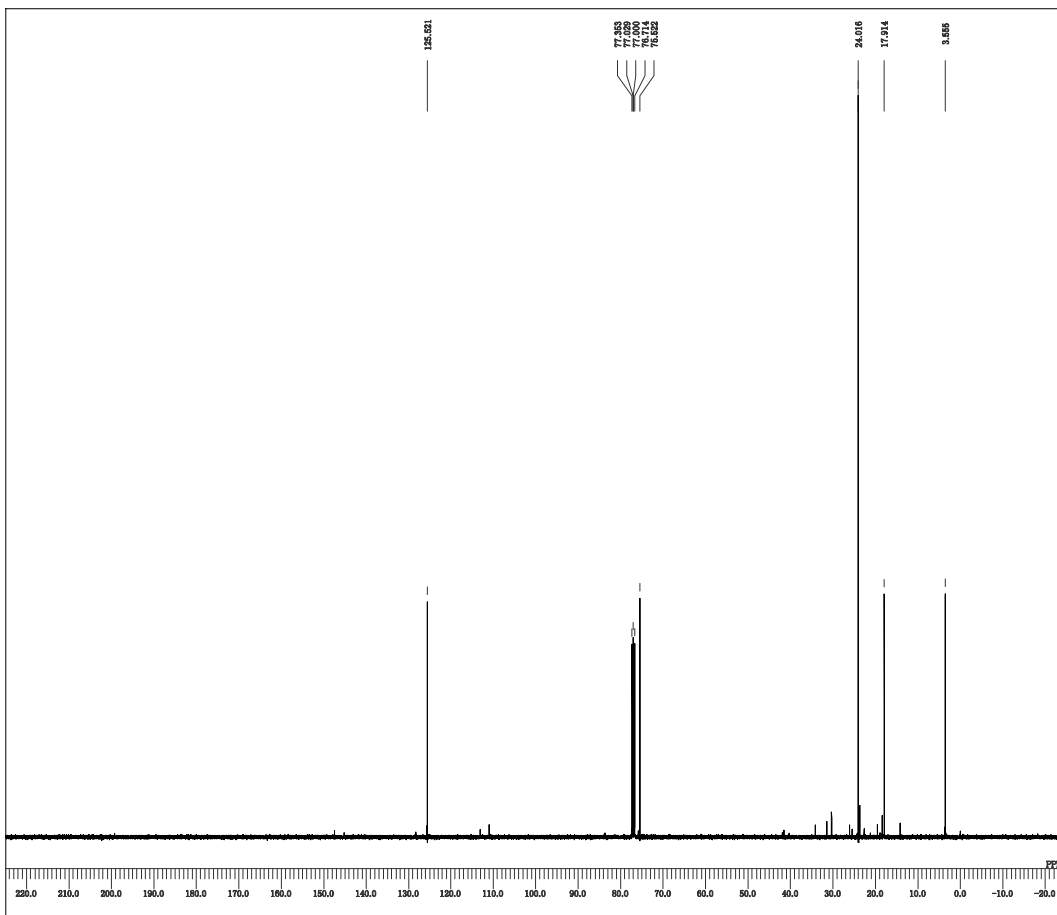

DP1L TD139\_13C.R-4-9-1-1a  
 COMPT 2022-01-13 17:17:04  
 DATM 13C  
 OBNUC single\_pulse.ac  
 EMCD 100.63 MHz  
 OFRQ 5.36 Hz  
 OFPN 5.96 Hz  
 POINT 26874  
 PSEQJ 23125.34 Hz  
 SCANS 714  
 ACQTM 1.0433 sec  
 PD 1.2000 sec  
 PVI 2.98 usec  
 IRNLC 1H  
 CTBAP 20.9 °  
 SLVNT CDCl3  
 EXRBP 77.00 ppm  
 RF 6.20 Hz  
 RGAIN 60

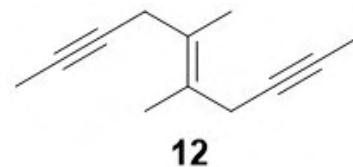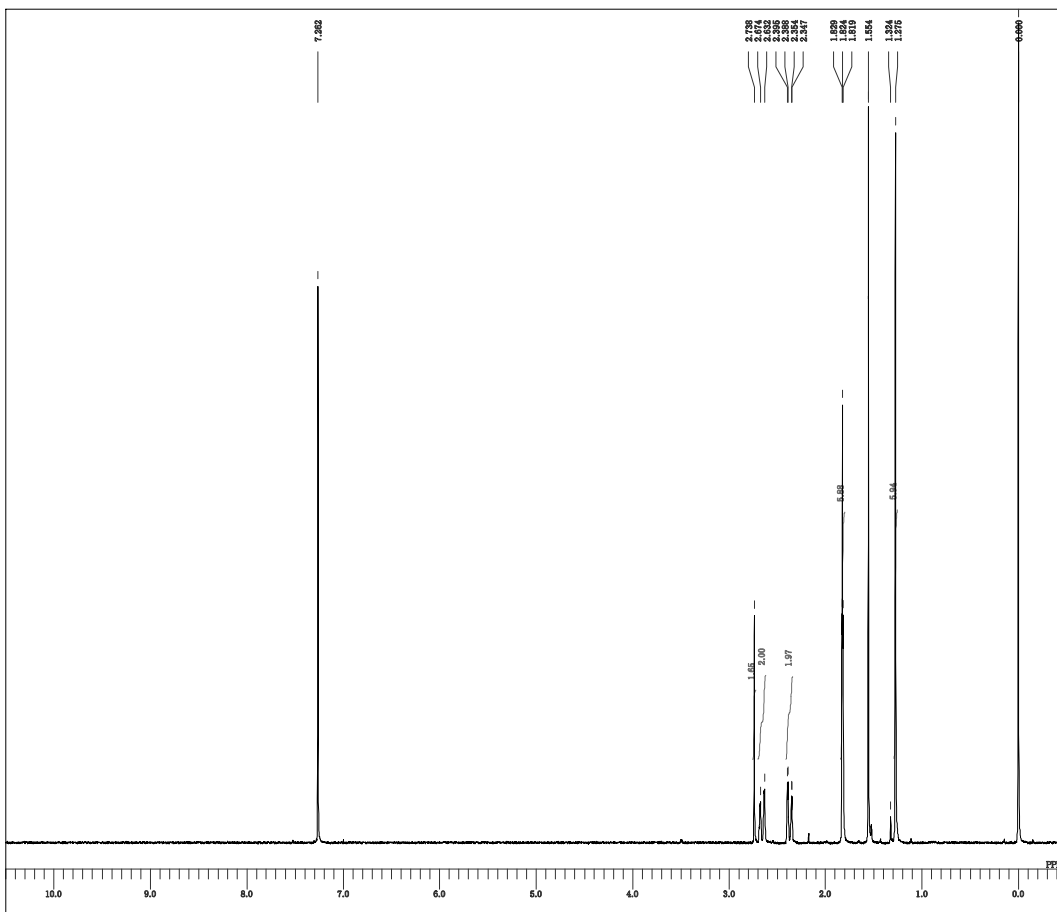

DP1L AK\_d12-1-1a  
 COMPT 2021-12-21 11:17:10  
 DATM 1H  
 OBNUC single\_pulse.ac2  
 EMCD 399.78 MHz  
 OFRQ 4.19 Hz  
 OFPN 7.29 Hz  
 POINT 13167  
 PSEQJ 6092.31 Hz  
 SCANS 8  
 ACQTM 2.187 sec  
 PD 2.0000 sec  
 PVI 5.00 usec  
 IRNLC 1H  
 CTBAP 21.0 °  
 SLVNT CDCl3  
 EXRBP 0.00 ppm  
 RF 6.20 Hz  
 RGAIN 62

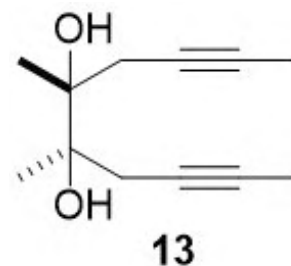

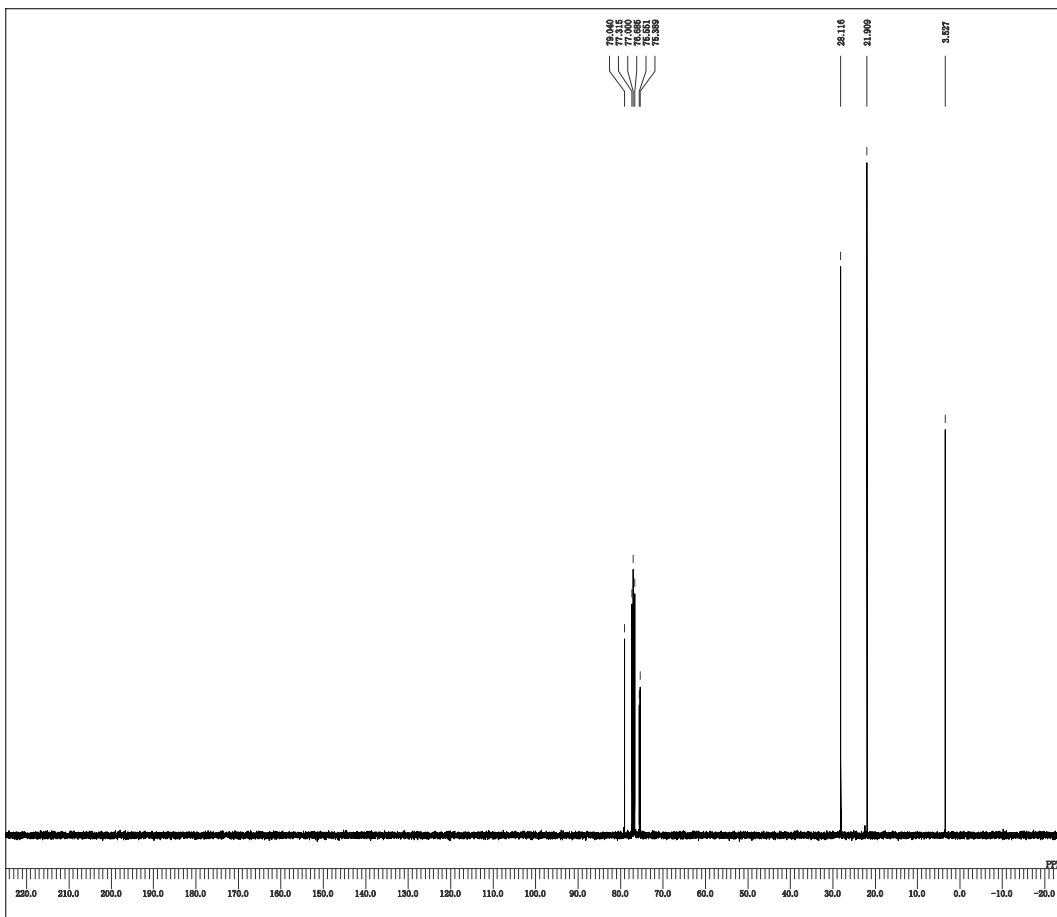

DP1L AK\_d12L19C-1.sis  
COMPT 2022-02-02 15:06:23  
DATM 13C  
EXPNO 1  
PROCNO 1  
PROBHD 5mm  
PULPROG zgpg30  
SFO 100.63 MHz  
OBSFREQ 100.63 MHz  
OBSRV 5.36 Hz  
OBSR2 5.36 Hz  
POINT 26871  
FREQ 201.54 Hz  
P2 377  
SCANS 1.0620 sec  
AQ 1.2000 sec  
F2 1H  
RGAIN 2.98 usec  
IRVLC 1H  
CTEMP 20.6 °C  
SOLVENT CDCl3  
EXREF 77.00 ppm  
RF 0.20 Hz  
RGAIN 60

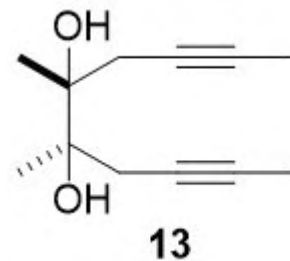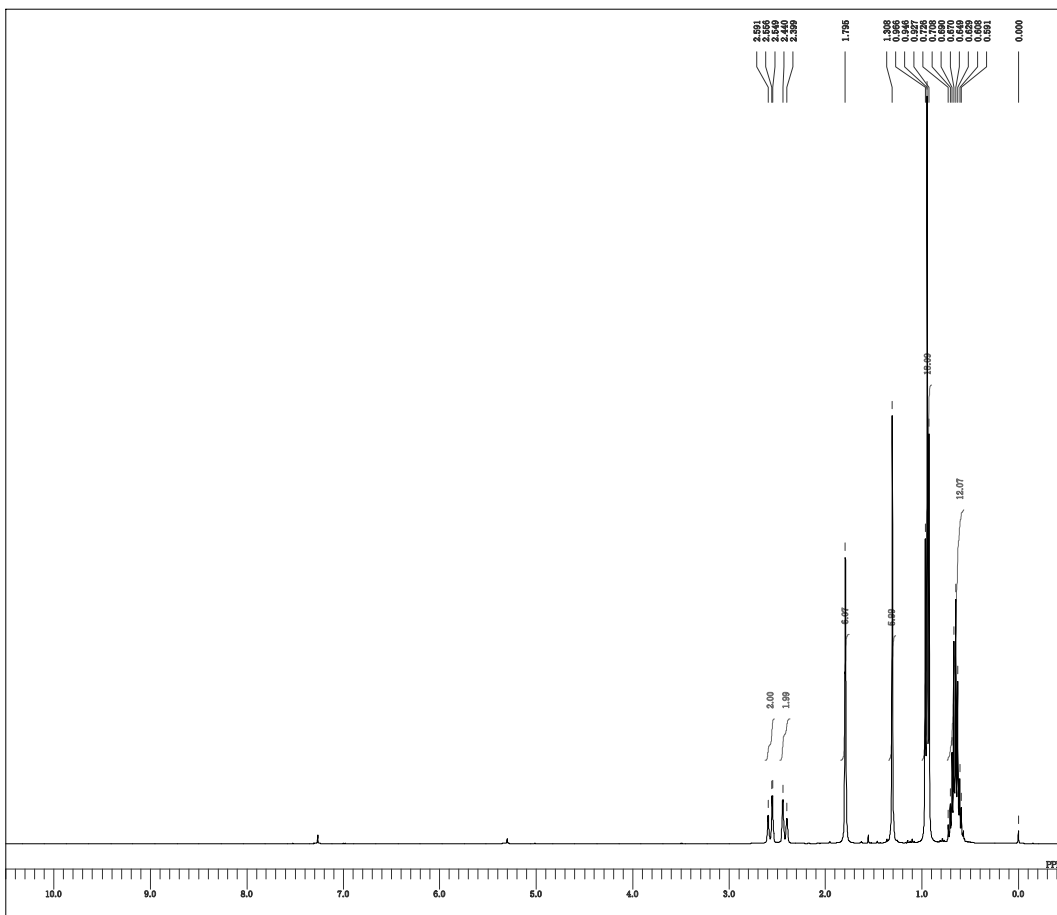

DP1L AK\_TESARyne\_1H-1.sis  
COMPT 2022-02-02 11:31:28  
DATM 1H  
EXPNO 1  
PROCNO 1  
PROBHD 5mm  
PULPROG zgpg30  
SFO 399.78 MHz  
OBSFREQ 399.78 MHz  
OBSRV 4.19 Hz  
OBSR2 7.29 Hz  
POINT 15107  
FREQ 6002.51 Hz  
P2 8  
SCANS 2.1877 sec  
AQ 2.0000 sec  
F2 1H  
RGAIN 5.00 usec  
IRVLC 1H  
CTEMP 20.1 °C  
SOLVENT CDCl3  
EXREF 0.00 ppm  
RF 1.40 Hz  
RGAIN 24

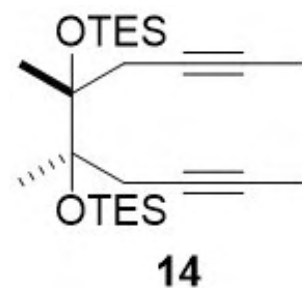



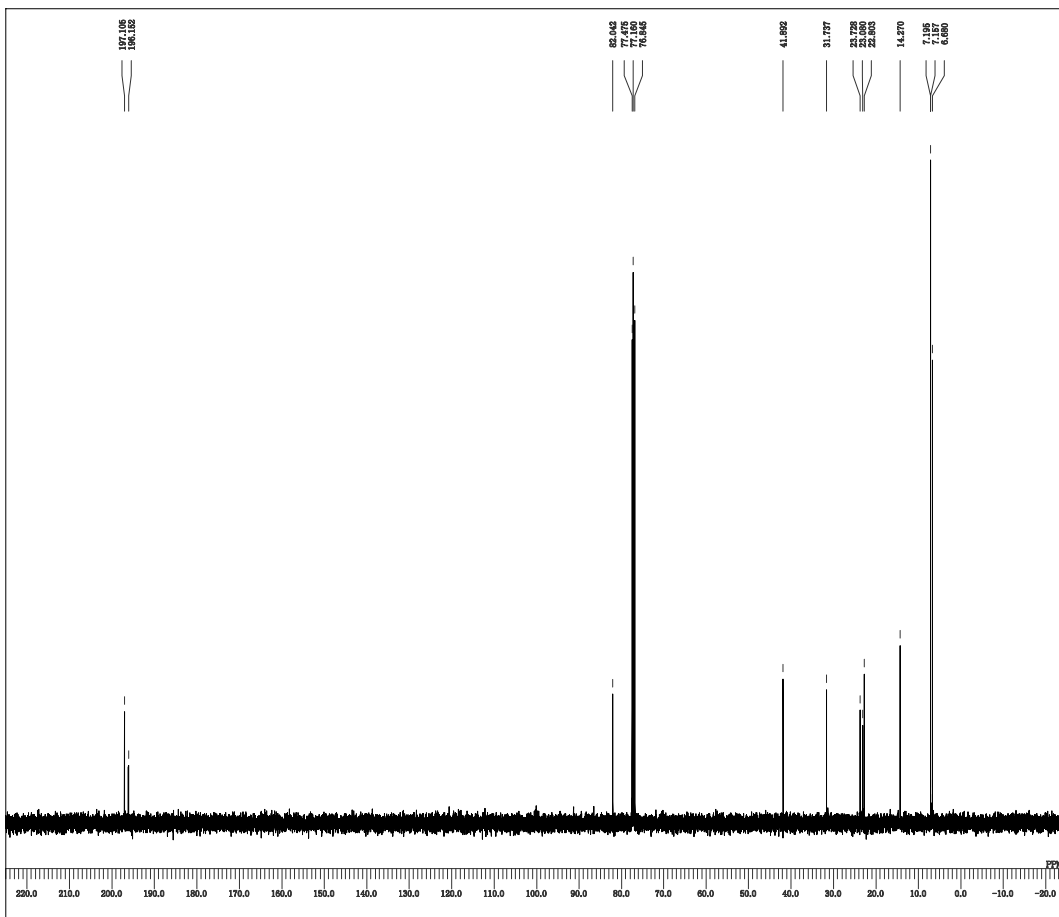

DP15 ak-323-tetra-C.als  
 COMPT 2021-10-13 16:07:03  
 DATM 13C  
 ENMCD single\_pulse.ac2  
 OBPRQ 100.63 MHz  
 OBSRT 6.36 Hz  
 OBRPN 6.96 Hz  
 POINT 26874  
 PREQU 201.51 Hz  
 SCANS 221  
 ACQTM 1.0633 sec  
 PD 1.2000 sec  
 PVI 2.98 usec  
 INMJC 1H  
 CTMPC 22.9 °  
 SLVNT CDCl3  
 EXRSP 77.16 ppm  
 RF 6.20 Hz  
 RGAIN 60

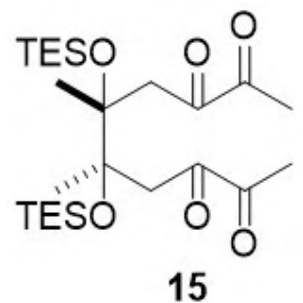

15

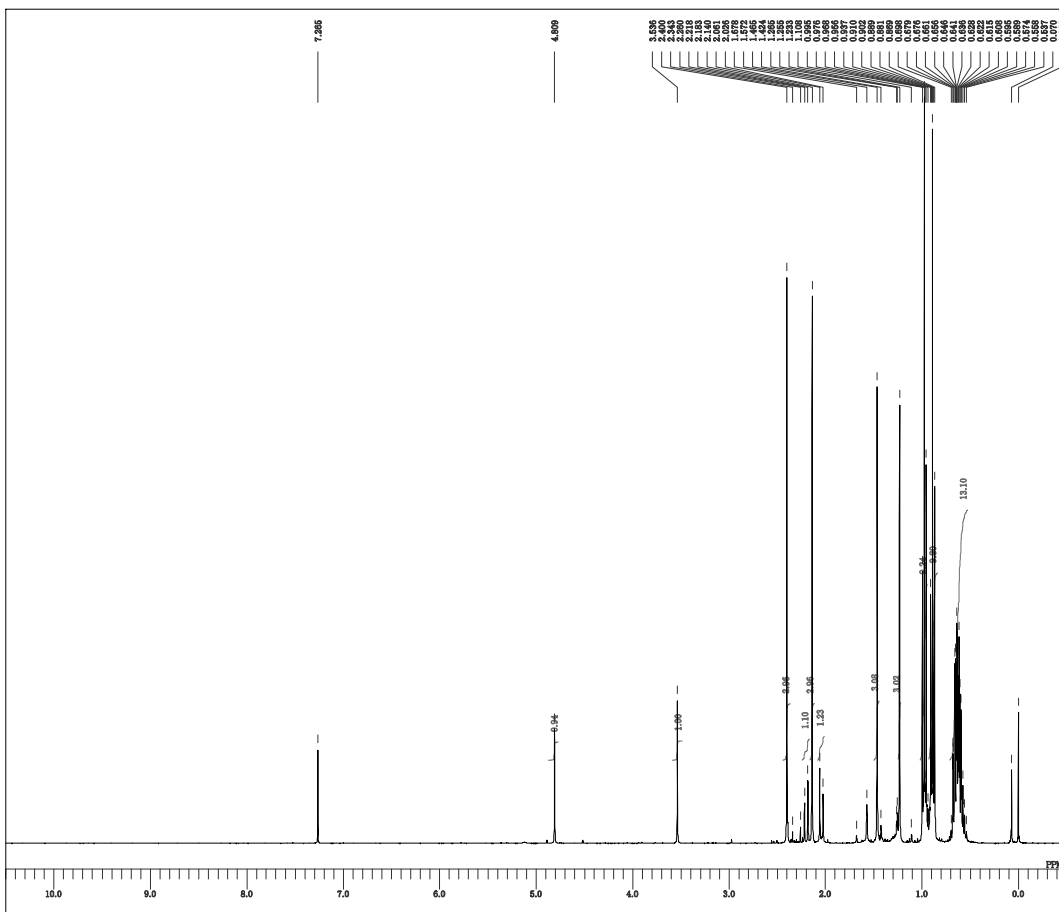

DP15 ak-337-T1-1.als  
 COMPT 2021-10-27 18:12:42  
 DATM 1H  
 ENMCD single\_pulse.ac2  
 OBPRQ 399.78 MHz  
 OBSRT 4.19 Hz  
 OBRPN 7.29 Hz  
 POINT 15167  
 PREQU 600.21 Hz  
 SCANS 8  
 ACQTM 2.1877 sec  
 PD 2.0000 sec  
 PVI 5.50 usec  
 INMJC 1H  
 CTMPC 21.3 °  
 SLVNT CDCl3  
 EXRSP 0.00 ppm  
 RF 6.20 Hz  
 RGAIN 96

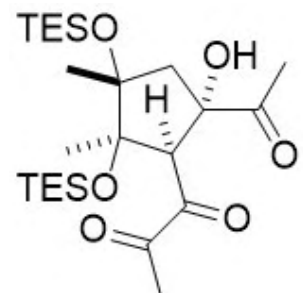

16





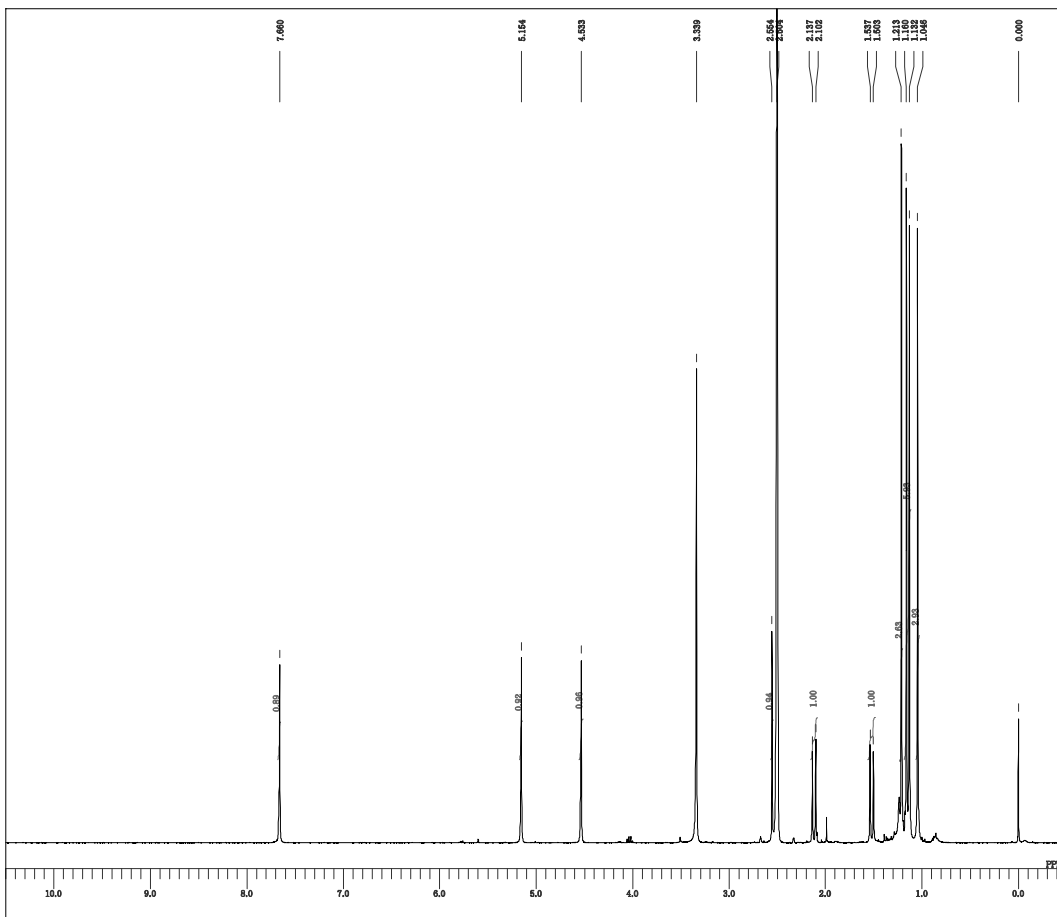

DP1L Nasterival A, racoonm\_UH-1 Lab  
 COMPT 2022-04-06 11:18:24  
 DATM 1H  
 OBNUC 390.78 MHz  
 EXMCD 4.19 Hz  
 OBFREQ 7.59 Hz  
 OBFPH 13107  
 PFCPU 6002.1 Hz  
 SCANS 8  
 ACQTM 2.1857 sec  
 PD 2.0000 sec  
 PVI 5.00 usec  
 IRNUC 1H  
 CTMPP 21.6 c  
 SLVNT DMSO  
 EXREP 0.00 ppm  
 RF 0.20 Hz  
 RGAIN 42

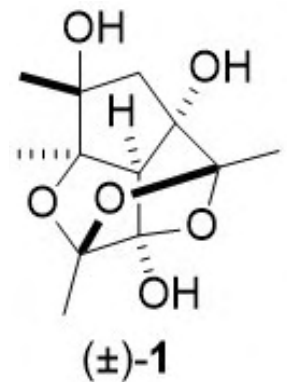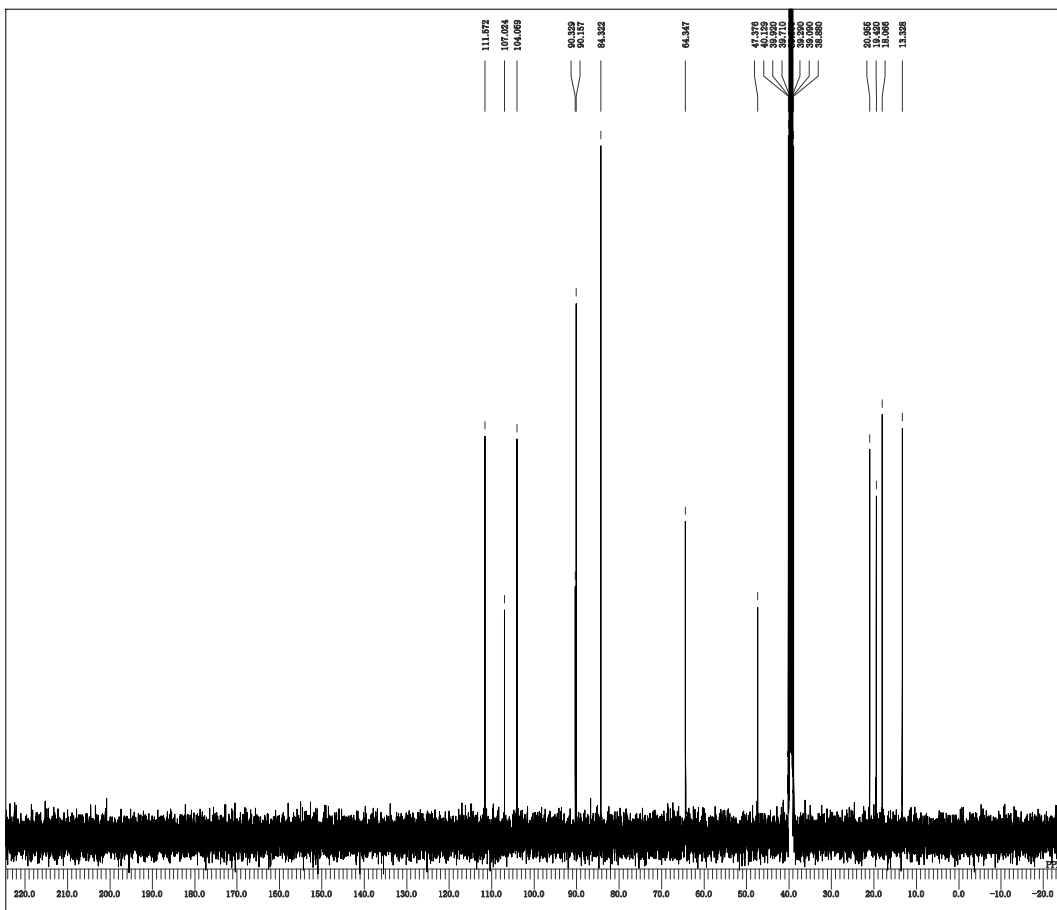

DP1L Nasterival A, 13C-1 Lab  
 COMPT 2022-02-07 12:10:11  
 DATM 13C  
 OBNUC 100.63 MHz  
 EXMCD 5.35 Hz  
 OBFREQ 5.89 Hz  
 OBFPH 26214  
 PFCPU 26126.54 Hz  
 SCANS 1000  
 ACQTM 1.0483 sec  
 PD 1.2000 sec  
 PVI 2.59 usec  
 IRNUC 1H  
 CTMPP 20.6 c  
 SLVNT DMSO  
 EXREP 50.00 ppm  
 RF 0.20 Hz  
 RGAIN 60

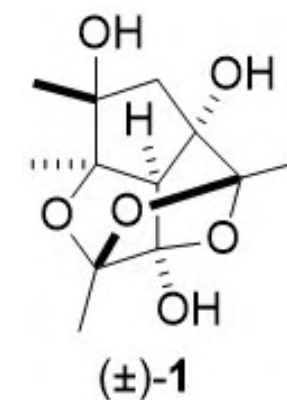

タイトル : td 55acr  
 データ : C:\LC\Database\LCDatabase.mdb RSLT0356  
 日時 : 収集 2021/09/09  
 カップ番号 :  
 収集属性 :  
 計算方法 : 百分率法  
 希釈率 : 1.00000

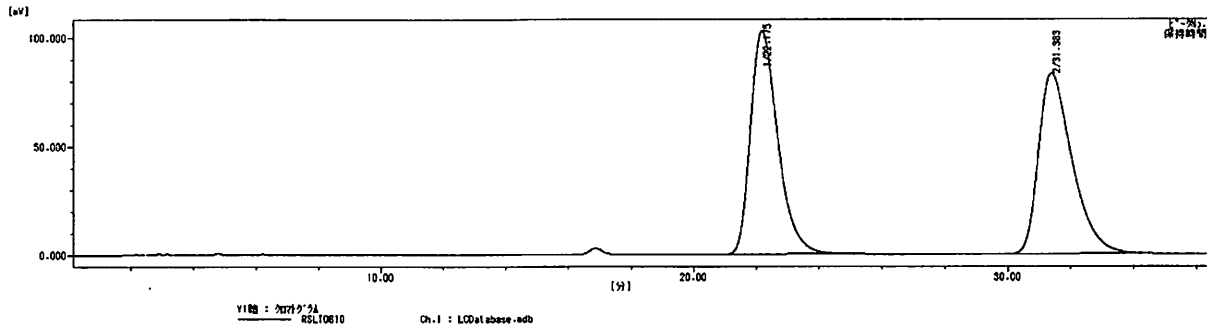

Conditions:

Solvent: IPA/Hexane = 1/99  
 Detect: 254 nm  
 Column: chiralpak AD-H  
 Flow: 1 mL/min

| ピークNo. | 保持時間   | 成分名 | 面積 [mV × 秒] | 高さ [mV] | 面積比 [%] |
|--------|--------|-----|-------------|---------|---------|
| 1      | 22.175 |     | 6265.955    | 102.963 | 50.057  |
| 2      | 31.383 |     | 6251.754    | 83.287  | 49.943  |
| ALL    |        |     | 0.000       | 0.000   | 100.000 |

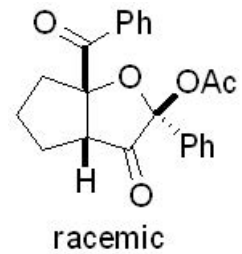

タイトル : td 55acee  
 データ : C:\¥LC¥Database¥LCDatabase.mdb RSLT0356  
 日時 : 収集 2021/09/09  
 カップ番号 :  
 収集属性 :  
 計算方法 : 百分率法  
 希釈率 : 1.00000

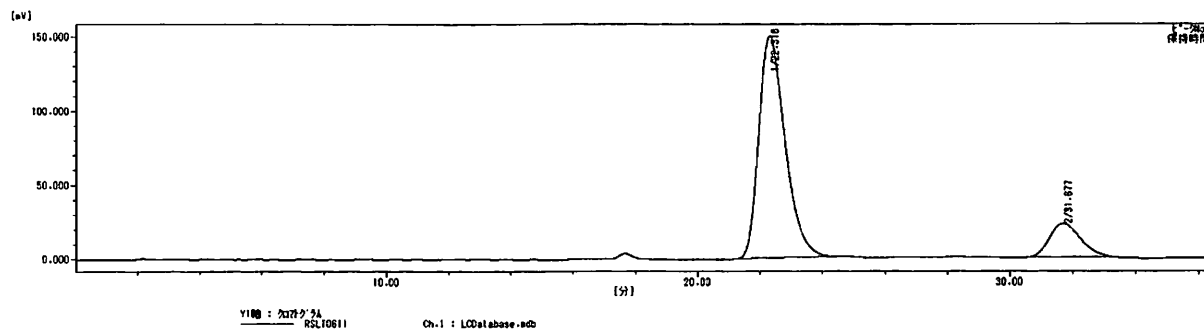

Conditions:  
 Solvent: IPA/Hexane = 1/99  
 Detect: 254 nm  
 Column: chiralpak AD-H  
 Flow: 1 mL/min

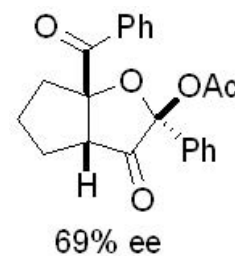

| ピークNo. | 保持時間   | 成分名 | 面積 [mV × 秒] | 高さ [mV] | 面積比 [%] |
|--------|--------|-----|-------------|---------|---------|
| 1      | 22.318 |     | 8712.257    | 149.621 | 84.674  |
| 2      | 31.677 |     | 1576.905    | 22.735  | 15.326  |
| ALL    |        |     | 0.000       | 0.000   | 100.000 |

タイトル : td144  
 データ : C:\LC\Database\LCDatabase.mdb RSLT0356  
 日時 : 収集 2022/02/01  
 カップ番号 :  
 収集属性 :  
 計算方法 : 百分率法  
 希釈率 : 1.00000

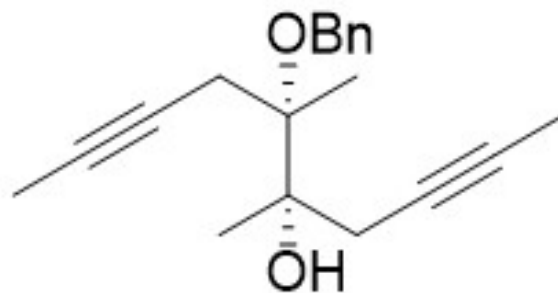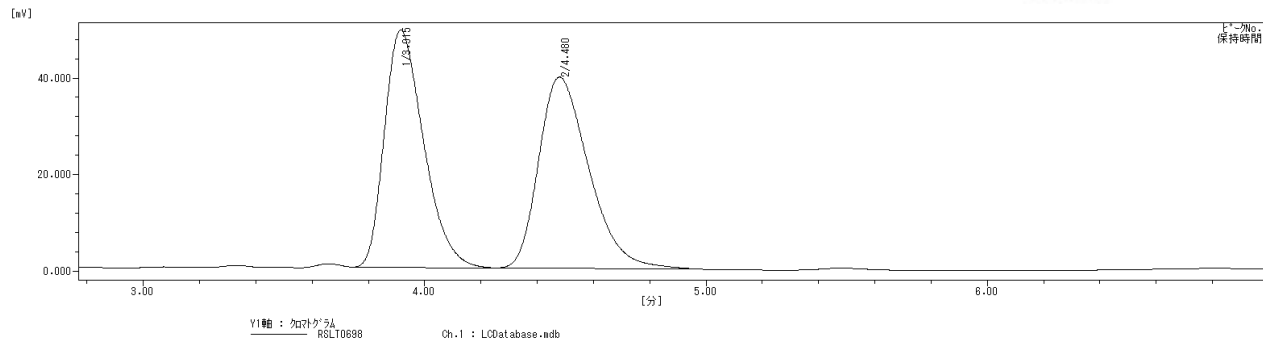

Conditions:

Solvent: IPA/Hexane = 1/9

Detect: 254 nm

Column: chiralpak OJ-H

Flow: 1 mL/min

| ピークNo. | 保持時間  | 成分名 | 面積[mV × 秒] | 高さ[mV] | 面積比[%]  |
|--------|-------|-----|------------|--------|---------|
| 1      | 3.915 |     | 474.827    | 49.180 | 49.288  |
| 2      | 4.480 |     | 488.546    | 39.543 | 50.712  |
| ALL    |       |     | 0.000      | 0.000  | 100.000 |
